1 **A genetic shift in an escaped transmitted/founder virus guides**  
2 **combinatorial vaccine design against HIV-1**

3  
4 Swati Jain<sup>1</sup>, Gherman Uritskiy<sup>1</sup>, Marthandan Mahalingam<sup>1</sup>, Himanshu Batra<sup>1</sup>, Subhash Chand<sup>1</sup>,  
5 Hung Trinh<sup>2</sup>, Charles Beck<sup>4</sup>, Woong-Hee Shin<sup>5,6</sup>, Wadad AlSalmi<sup>1</sup>, Gustavo Kijak<sup>2</sup>, Leigh Anne  
6 Eller<sup>2</sup>, Jerome Kim<sup>3</sup>, Daisuke Kihara<sup>5,7</sup>, Sodsai Tovanabutra<sup>2</sup>, Guido Ferrari<sup>4</sup>, Merlin Robb<sup>2</sup>,  
7 Mangala Rao<sup>3</sup>, and Venigalla B. Rao<sup>1\*</sup>

8  
9 <sup>1</sup>Bacteriophage Medical Research Center, Department of Biology, The Catholic University of  
10 America, Washington, D.C, United States of America

11 <sup>2</sup>U.S. Military HIV Research Program, Henry M. Jackson Foundation, MD, United States of  
12 America

13 <sup>3</sup>U.S. Military HIV Research Program, Walter Reed Army Institute of Research, MD, United  
14 States of America

15 <sup>4</sup>Department of Molecular Genetics and Microbiology, Duke University, Durham, NC, United  
16 States of America

17 <sup>5</sup>Department of Biological Sciences, Purdue University, IN, United States of America

18 <sup>6</sup>Department of Chemical Science Education, Sunchon National University, Suncheon 57922,  
19 Republic of Korea

20 <sup>7</sup>Department of Computer Science, Purdue University, IN, United States of America

21

22

23

24 \*Corresponding author E-mail: [rao@cua.edu](mailto:rao@cua.edu)

25

26

27

28

29

30

31

32

### 33 **Abstract**

34 A productive HIV-1 infection is often established by a single transmitted/founder (T/F) virus,  
35 which then evolves into a complex mixture of variants during the lifetime of infection. An effective  
36 vaccine should have sufficient breadth to block the entry of diverse T/F involved in different  
37 infections. Although the variable V1V2 domain of HIV-1 envelope protein (Env) is found to be a  
38 good target for vaccine design based on the correlates of protection in the modestly successful  
39 RV144 trial, the breadth of immune responses has to be substantially enhanced to improve vaccine  
40 efficacy and minimize the emergence of breakthrough infections. Here, we report a remarkable  
41 genetic shift in a T/F virus from a participant of an acute HIV infection cohort\_RV217 study. It  
42 resulted in substitution of histidine at position 173 to tyrosine (H173Y) at week 24 (wk 24) after  
43 infection, coinciding with the disappearance of strictly H173-specific first wave antibodies.  
44 Intriguingly, a second wave antibodies emerged against the escaped Y173 variant that displayed  
45 increased breadth recognizing both the H173 and Y173 epitopes. This differential antibody  
46 responses towards variant epitopes were recapitulated in a mouse model. Structural analyses  
47 suggest distinct conformations for H173 and Y173 variants which might have led to antibody  
48 responses with different reactivity and breadth. Given the occurrence of conformational dynamism  
49 in the V2 region, combinatorial V2 vaccine candidates consisting of numerous conformational  
50 variants in the natural HIV-1 diversity were designed and tested as an immunogen. These libraries,  
51 especially the Y173 variant libraries that also contained a V1 loop deletion showed increased  
52 breadth and cross-reactivity to diverse HIV-1 Env proteins. This combinatorial design might be a  
53 powerful strategy in the future design of highly efficacious HIV-1 vaccine candidates.

54

## 55 **Author summary**

56 After numerous HIV-1 vaccine failures, only one human clinical study, RV144 has demonstrated  
57 protection with modest efficacy (31.2%) by virtue of antibody responses directed to V2-region of  
58 the Env that were correlated with reduced HIV acquisition. In natural infection, there occurs an  
59 evolutionary race between virus and the host immune system, as a result of which mutants of virus  
60 that escape the immune pressure are positively selected. Similarly, in vaccinated individuals,  
61 breakthrough infections occur when the infecting virus is able to escape from vaccine generated  
62 immune response compromising vaccine efficacy. Systematic learning of how these escape  
63 signatures are positively selected during the course of infection can have implications in designing  
64 a vaccine that can effectively counteract breakthrough infections. In the current study, we took an  
65 unprecedented approach of studying evolution of T/F viruses in acutely infected individuals to  
66 identify early V2-specific escape mutations and further study these mutations through  
67 biochemical, immunological and structural aspects. The knowledge obtained from these analyses  
68 was used to rationally design combinatorial vaccine libraries encompassing V2 variants mirroring  
69 natural HIV-1 population and assess their response in mice. The resultant vaccines generated  
70 antibodies were found to broadly cross-react diverse Env proteins. Such immune escape guided  
71 rationally designed vaccines have the potential to overcome breakthrough infections and improve  
72 vaccine efficacy.

73

74

75

76

77 **Striking image**

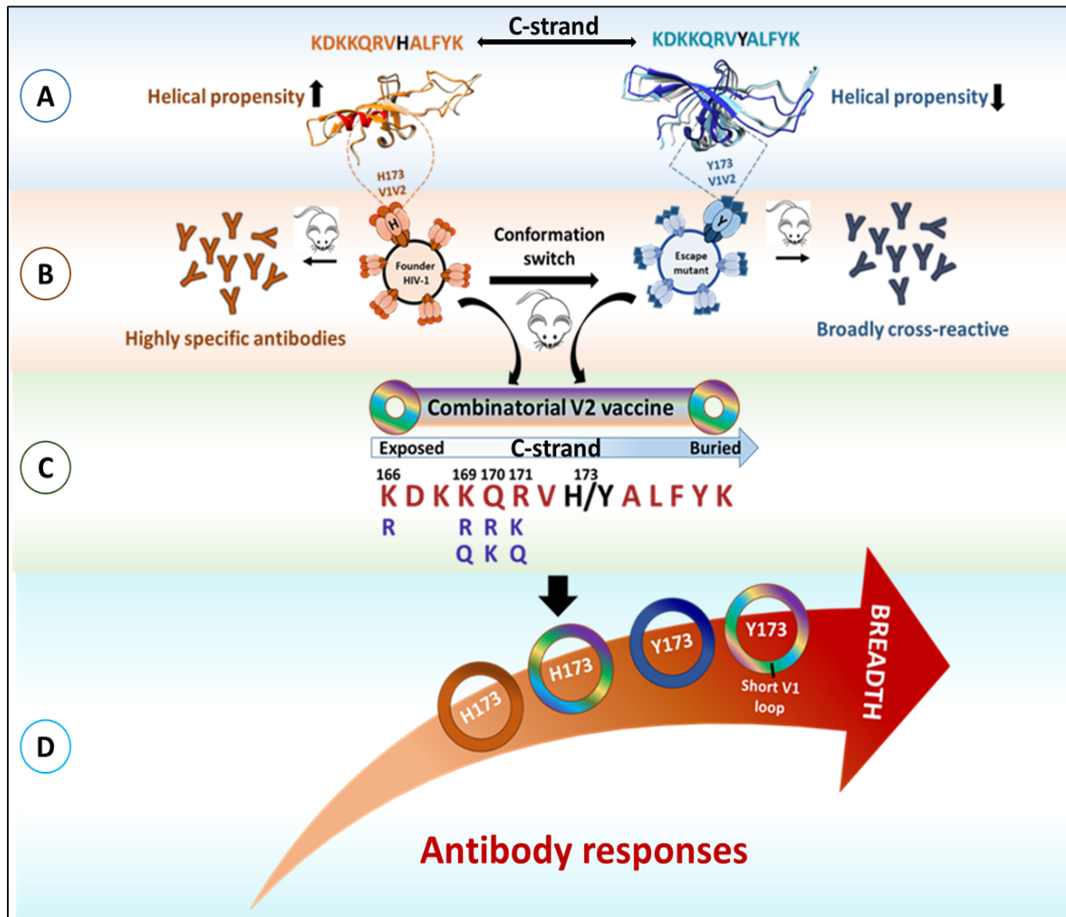

78

79

80

81

82

83

84

85

## 86 **Introduction**

87           While combinatorial antiretroviral therapy (cART) has greatly improved the life  
88 expectancy of HIV patients, it doesn't cure the infection even with life-long commitment (1, 2). In  
89 the absence of a preventative vaccine, HIV-1 continues to be a global public health concern,  
90 causing 1.8 million new infections annually (3). After dozens of HIV-1 vaccine failures in the last  
91 four decades, the only vaccine trial that showed promise is the phase III RV144 trial conducted in  
92 Thailand (4-6). RV144 demonstrated an early efficacy of ~60% reduction in HIV acquisition at  
93 12-months post-vaccination which gradually declined to 31.2% at 42 months (7, 8). Several studies  
94 demonstrated the correlation of IgG antibodies specific to the V1V2 variable domain of the HIV  
95 envelope protein (Env) to vaccine efficacy (9-11). Notably, protection was not due to their ability  
96 to neutralize the virus but most likely, due to their Fc effector function, specifically the antibody-  
97 dependent cell cytotoxicity (ADCC) (10). Furthermore, sieve analysis of the breakthrough  
98 infections in RV144 vaccinees showed mutations in the V2 domain, specifically the semi-  
99 conserved structural core encompassing residues 166 to 183 that seems to be the prime target of  
100 vaccine-induced immune pressure (12).

101           Env is expressed as a 160 kD glycoprotein (gp160) and cleaved by the cellular protease  
102 furin into gp120 and gp41 subunits. The membrane-external subunit, gp120, has five conserved  
103 regions (C1, C2, C3, C4 and C5) and five variable regions (V1, V2, V3, V4 and V5) that are  
104 alternately positioned in the Env sequence with the exception of V1V2 variable regions that  
105 assemble as a single domain (13, 14). Three protomers, each composed of non-covalently  
106 associated gp120 and gp41 subunits, assemble as a trimeric spike on the viral envelope. The V1V2  
107 domain forms a well-exposed "crown" of the mushroom-shaped spike, hence a frequent target of

108 the host immune system. Each of the three V1V2 domains consists of a conserved Greek-key motif  
109 structure with 4-5  $\beta$ -strands (A, B, C, C', D) forming an anti-parallel  $\beta$ -sheet and two  
110 hypervariable loops that are expected to be flexible and conformationally dynamic (15). The virus  
111 takes advantage of region to engage into immune battle with the host defenses undergoing  
112 mutations particularly in the hypervariable loops (11, 16-18). Inter-protomeric interactions within  
113 V1V2 moieties are also responsible for the stability and infectivity of a native functional trimer.

114 The Env spike on the surface of HIV undergoes an essential interaction with its primary  
115 receptor, CD4 followed by CCR5/CXCR4 co-receptor on the CD4+ T cell for viral entry (19-22).  
116 In addition to CD4 and CCR5/CXCR4 receptors, interaction of V2 region on the Env with an  
117 integrin,  $\alpha 4\beta 7$  has also been implicated as a significant contributor in the pathogenesis of HIV-1  
118 dissemination and gut-reservoir establishment in the infected individuals (23, 24). Recently, it has  
119 been shown that V2 domain by virtue of mimicking MadCAM, a natural ligand of  $\alpha 4\beta 7$ , assists in  
120 co-stimulation of CD4+ T cells promoting HIV-1 replication during an acute stage of infection  
121 (25). RV144 vaccinees generated non-neutralizing V2 antibodies are also shown to block  
122 interaction with  $\alpha 4\beta 7$  (26-28).

123 The V1V2 domain of HIV-1 envelope protein is therefore an attractive target for vaccine  
124 design and V2-directed responses have the potential to block HIV acquisition. At the site of  
125 exposure, the human host is often exposed to a complex genetic pool of highly diverse and  
126 heterogeneous viral quasispecies from an infected donor of which only one (or a few) transmitted  
127 founder (T/F) virus can successfully establish a productive infection. However, studies  
128 systematically addressing how T/F viruses escape from V2-directed Ab responses resulting in  
129 breakthrough infections and hence poor vaccine efficacy, are largely limiting. Furthermore, the

130 mechanisms by which HIV-1 might exploit the structural and conformational variability of V2  
131 domain as an immune-escape strategy remained poorly understood.

132 Here, we investigated how a T/F virus escape from V2-directed responses in the acute  
133 phase of infection to obtain insights for designing a vaccine that can be broadly effective against  
134 diverse strains of HIV-1. Our study identified a mutation in the semi-conserved epitope of the V2  
135 region of the Env of a T/F virus in one of the RV217 study participants that led to virus-escape  
136 during an early phase of natural infection. Furthermore, our data demonstrates a switch in V2-  
137 epitope conformation owing to this mutation in such a way that the resultant conformation elicited  
138 broadly reactive antibody responses. These findings led to a combinatorial vaccine design by  
139 incorporating potential escape variants to increase the breadth of antibody responses against the  
140 V2 domain.

## 141 **Results**

### 142 **Overall experimental design**

143 We hypothesized that understanding how the T/F viruses escape host immune pressure at  
144 the very early stages of infection might identify variations that if included in a HIV vaccine could  
145 stimulate broader immune responses and interfere or block HIV acquisition. Our primary focus is  
146 the V1V2 domain of HIV-1 envelope protein as it is one of the key determinants of virus escape.  
147 We therefore studied the evolution of V1V2 domain in T/F viruses from four HIV-1 infected  
148 participants of RV217 Early Capture HIV Cohort (ECHO) project (Fig 1).

149 The vaccine design process involved a series of steps. First, we performed phylogenetic  
150 analyses of longitudinal Env sequences to identify V1V2-specific variants that correlate with T/F

151 virus escape (Fig 1a). Second, the selected escape variants were fused with the dodecameric  
152 bacteriophage T4 terminase protein, gp16, to generate V1V2 epitope-displaying nanoscaffolds.  
153 Since gp16 is highly soluble and assembles into stable oligomers, 11-mers and 12-mers (29), this  
154 design would symmetrically display multiple V1V2 domains for effective antigen presentation  
155 (Fig 1b). Third, these constructs were expressed in GnTi cells to produce gp16-scaffolded V1V2  
156 escape mutant domains with native-like high mannose glycosylation (Fig 1c). Fourth, the  
157 immunogenicity of the V1V2 variants was evaluated in a mouse model to determine if they could  
158 stimulate escape mutant-specific immune responses (Fig 1d). Finally, cocktails of V1V2 variant-  
159 targeted immunogen pools were created to determine if such pools would elicit immune responses  
160 with increased breadth that recognize diverse HIV-1 Env antigens (Fig 1e). If broadening of V1V2  
161 immunity occurred, it would inform on more effective HIV-1 transmission-targeted vaccine  
162 designs for clinical trials.



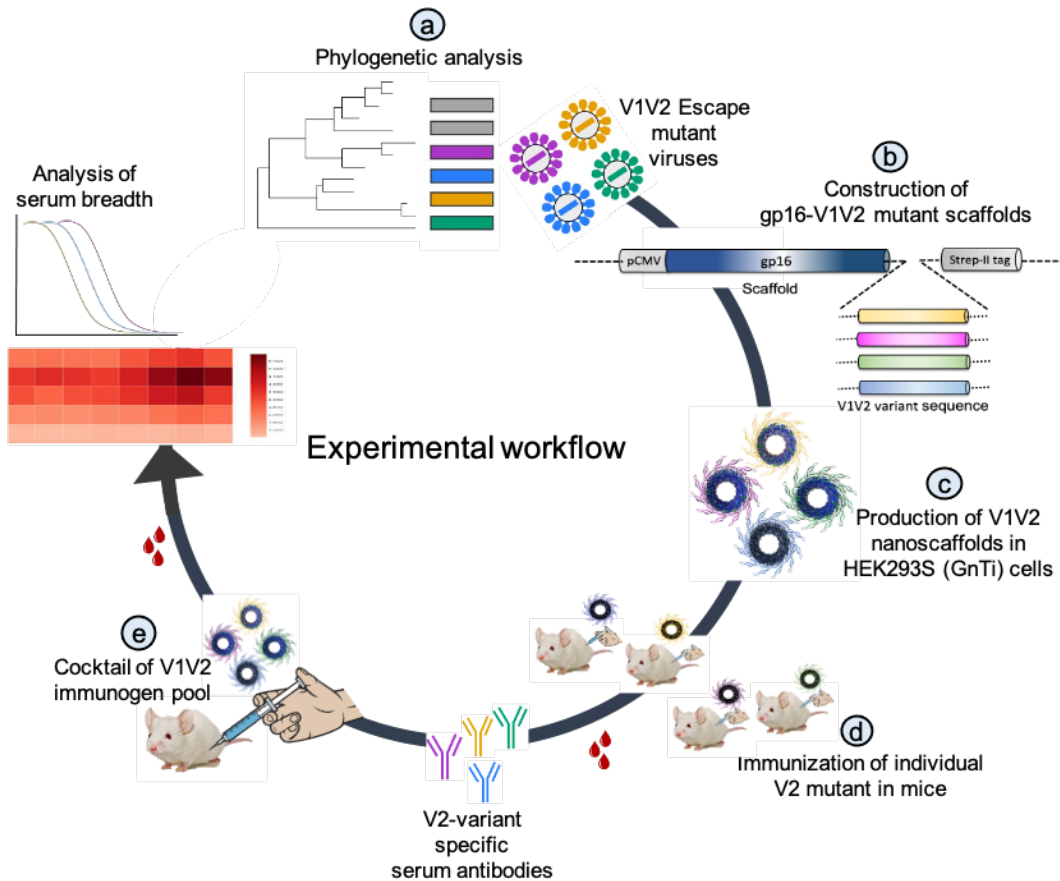

163

164 **Fig 1. Experimental design.** The experimental design consisted of multiple steps labeled a-e. (a) Phylogenetic  
165 analysis of longitudinal viral *env* sequences isolated from four RV217 study participants during acute HIV infection.  
166 (b) Selection of V1V2-specific escape variants and their fusion to the C-terminus of bacteriophage T4-derived small  
167 terminase protein, gp16 to generate gp16-V1V2 nanoscaffolds representing various escape mutations. (c) Expression  
168 of gp16-V1V2 escape mutants in GnTi mammalian cells to produce dodecameric nanoscaffold immunogens. (d)  
169 Immunization of V1V2 variant nanoscaffolds in mice and evaluation of their immunogenicity. (e) Rational design of  
170 combinatorial V1V2 mutant immunogens and evaluation of their immunogenicity and breadth of immune responses.

171

## 172 **Phylogenetic analyses identified a striking H173Y escape mutation in V2 domain**

173 A series of HIV-1 viral *env* sequences were isolated from four HIV-1 infected participants  
174 of the RV217 ECHO project through single genome amplification (SGA) (Reference IDs: 40007,  
175 40061, 40094, and 40100). Using a sensitive nucleic acid test, each study participant was  
176 confirmed of HIV-1 positivity just days after a negative test (Fiebig stage I) and none were put on  
177 on antiretroviral therapy (ART) during the timeframe of the study. *Env* sequences were obtained

178 at three time points, wk 1, 4 (~1 month), and 24 (~6 months) following the positive test. That a  
179 single T/F virus was responsible for infection in each participant was ascertained by aligning  
180 independently isolated *env* sequences from wk 1 plasma, which were nearly identical (30). Plasma  
181 viral load with peak, nadir, and set point viremia shown for one representative patient (40007)  
182 indicated a typical pattern of early captured infection (Fig S1). Around 30 sequences were analyzed  
183 from each patient (median of 10 sequences per visit), with 152 sequences in total across all four  
184 patients, over a period of up to 6 months post-infection.

185 To trace viral phylogeny in each of the T/F viruses (hereafter referred to as T/F07, T/F61,  
186 T/F94 and T/F100), the longitudinal *env* sequences were translated to protein sequences and  
187 aligned. Multiple sequence alignments were then used to construct phylogenetic trees using the  
188 respective T/F virus *env* sequence as root for the tree construction. Of the four T/F viruses, T/F61  
189 showed a few dominant mutations, occurring in more than 50% of the viruses, in the V1V2 loop  
190 region, while T/F100 was found to be the most rapidly diverged virus with mutants appearing at  
191 as early as one wk after infection. By wk 4, a major branch of diverging T/F100 viruses harboring  
192 mutations in the V1V2 domain appeared. In addition, there were mutations in V5 variable loop  
193 and the less conserved  $\alpha 2$  helix of C3 constant region. T/F94 viruses also acquired various  
194 mutations including deletions in the variable V1V2 and V5 regions. Not surprisingly, most of these  
195 mutations are in the surface-exposed variable regions of HIV-1 trimer with hotspots in the loop  
196 regions (Fig 2A-B).

197 On the other hand, T/F07 virus did not show any variants until wk 4. At 24-wk post-  
198 infection, however, nearly the entire T/F07 virus population shifted to a single variant containing  
199 two mutations, one at position 173 that changed histidine to tyrosine (H173Y) and another at  
200 position 236 that changed lysine to threonine (K236T). The K236T mutation restored the well-

201 conserved N-linked glycan at position N234 located at gp120/gp41 interface. Additionally, in  
202 some of the variants, a 3-residue deletion in the variable V2 loop ( $\Delta$ DSV) and a 5-residue deletion  
203 ( $\Delta$ NTTRFL) in the variable V4 loop co-occurred with the H173Y mutation (Fig 2C-D). The  
204 H173Y mutation is localized in the relatively well-conserved “C”  $\beta$ -strand positioned at the  
205 junction of the cationic first half and the hydrophobic second half of the  $\beta$  strand (Fig 2E). These  
206 characteristics, a singular variant and striking shift of viral population, strongly suggested a linkage  
207 between the variant and the viral escape. This was in contrast to many mutations observed in the  
208 other three T/F viruses in the hypervariable V1 and V2 loops (Fig 2F) which are difficult to track  
209 and of little value for vaccine design.

210

211

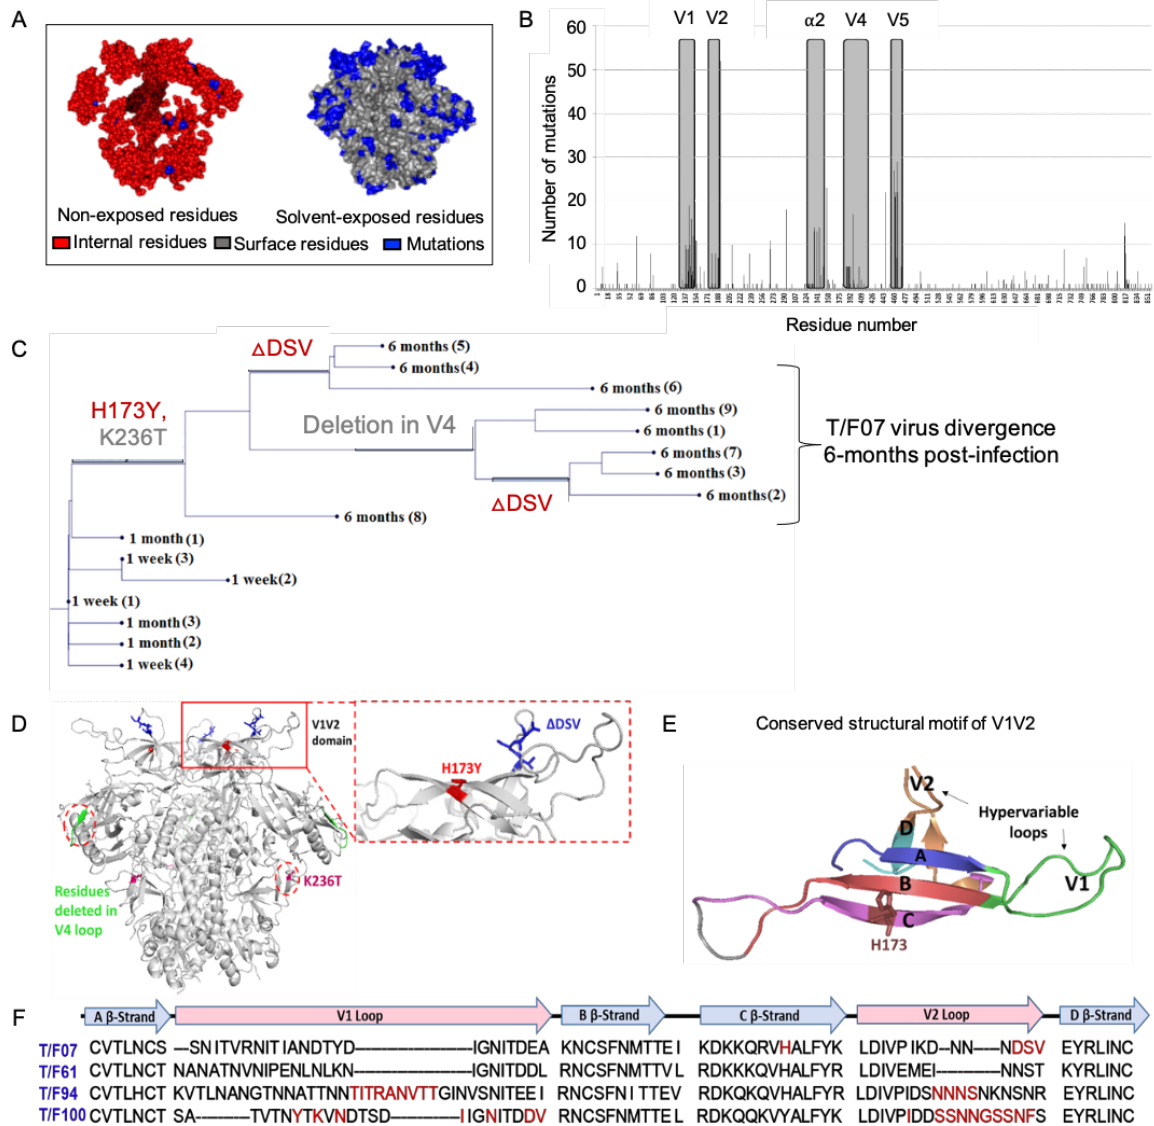

212

213 **Fig 2. Viral escape mutations in four RV217 participants during the acute stage of HIV infection.** (A) Mutations  
 214 observed in the RV217 participants 40007, 40061, 40094, and 40100 are placed on HIV-1 BG505 pre-fusion trimer  
 215 structure (PDB ID: 4TVP). Surface model showing dominant mutations (blue) falling on the solvent-exposed regions  
 216 of the Env (gray) but not on the non-exposed or buried region (red). Modeling was done with PyMol (ver. 1.74)  
 217 molecular visualization software and surface-exposed residues were defined as all residues that had  $>5\text{\AA}^2$   
 218 exposure to the solvent. (B) Mutational hotspots in the *env* sequence based on the genetic diversification of T/F viruses from all  
 219 four participants. Total number of mutations in a particular region is plotted on the y-axis against residue positions on  
 220 the *env* sequence (x-axis), with reference to HXB2 strain. The Env regions (labelled on top) with gray background  
 221 showed high frequency of mutations. (C) Phylogenetic tree displaying T/F07 virus evolution in 40007 participant. The  
 222 evolutionary tree was constructed by the neighbor-joining method, rooted to the T/F07 virus sequence. The viruses  
 223 are designated corresponding to the time post-infection, 1 wk, 1 month (4-wks) or 6-month (24 wks) at the nodes of  
 224 the branches. Prominent diverging mutations are labeled on the respective branches of the tree in red (V1V2 region)  
 225 and gray (another region). (D) Dominant mutations that occurred until 24-wk post-infection in 40007 participant are  
 226 modeled on a ribbon model of the T/F07 trimer, generated through homology modeling using BG505 trimer (PDB  
 227 ID: 4TVP) as a template. The zoom in image of V1V2 domain is shown to highlight the positions of V2-specific  
 228 mutations, H173Y (red) and 3-residue deletion, DSV (blue). Deletion in the variable, V4 region is depicted in bright

229 green and mutation in the conserved C2 region, K236T substitution, is shown in magenta. (E) A color-coded 4-5  $\beta$ -  
230 stranded (A-D) conserved Greek-key motif structure of V1V2 domain is represented showing residue 173 on the C-  
231 strand. (F) Snapshot of V1V2 sequences of T/F viruses from each RV217 participant under study. Major structural  
232 features of V1V2 region; semi-conserved four  $\beta$ -strands (A, B, C and D) and hypervariable V1 and V2 loops are  
233 labeled on top of the sequence. Prominent V1V2-specific mutation sites (observed in >50% of circulating viruses)  
234 until 24-wks are highlighted in red in the respective T/F virus sequence isolated from 40007, 40061, 40094 and 40100  
235 participants.

236

## 237 **The H173Y mutation in C $\beta$ -strand of V2 domain is a key determinant of virus escape against**

### 238 **host immune pressure**

239 The divergence of nearly the entire T/F07 virus population to H173Y variant made it a  
240 strong candidate for a viral escape mechanism. H173 is located in the C  $\beta$ -strand of V1V2 domain,  
241 a region that in previous studies was also found to be a critical target for host immune responses  
242 by RV144 trial vaccines. To determine if this mutant indeed arose through a strong selection  
243 against V2-directed antibody responses, the epitope specificity of antibodies was evaluated in the  
244 longitudinal plasma samples. The V1V2 domains, but not the full-length Env proteins, were used  
245 for testing in order to exclude the binding responses directed against other regions of the envelope  
246 protein. Four V1V2 domain nanoscaffolds were constructed with a C-terminal Strep-tag: gp16-  
247 H173 (“wild-type” T/F07) and three 24-wk V2 mutants namely, gp16-H173Y (Y173), gp16-  
248  $\Delta$ DSV, and gp16-Y173+ $\Delta$ DSV. These were expressed in HEK-GnTi (GnTi) cells and affinity-  
249 purified by StrepTactin chromatography (Fig S2). Binding of 40007 longitudinal plasma samples  
250 to these V1V2 variants was assessed by surface plasmon resonance (SPR) assay.

251 The epitope specificity data revealed remarkable specificity of V2-specific antibodies  
252 present at 24-wk post-infection to the original T/F07 virus but not to the H173Y variant. The  
253 antibodies bound strongly to V1V2-H173 and V1V2-H173. $\Delta$ DSV scaffolds but failed to bind  
254 Y173 variant scaffolds V1V2-Y173 and V1V2-Y173. $\Delta$ DSV (Fig 3A). These data demonstrated

255 that the H173Y mutation is a key determinant in epitope switching at the time of virus escape  
256 against host immune pressure. The DSV deletion mutation did not appear to play a direct role,  
257 though it might have an accessory role (see below).

258 In addition to this first “wave” of antibodies specific to H173 epitope, there was a second  
259 wave after the virus population switched to the resistant Y173 variant. SPR analyses showed that,  
260 contrary to the first wave, this second wave of antibodies exhibited increased breadth, recognizing  
261 both the V1V2-H173 and V1V2-Y173 variants (Fig 3A; see the peak for 1.4 years). Therefore, the  
262 second wave antibodies would be able to restrict both the original T/F07 H173 virus as well as the  
263 escaped Y173 variants, further supporting the hypothesis that the V2-region, in particular the C  $\beta$ -  
264 strand, is a critical target for mounting host immune pressure during acute HIV infection.

#### 265 **Recapitulation of escape mutant specificity in monoclonal antibodies from RV144 vaccinees**

266 Next, we evaluated the binding of H173 and Y173 variants to C  $\beta$ -strand-specific  
267 monoclonal antibodies (mAbs) CH58 and CH59 isolated from RV144 trial vaccinees. These  
268 antibodies are specific to the H173 C  $\beta$ -strand present in the gp120 immunogen used in the RV144  
269 vaccine trial. As mentioned above, the moderate protection observed by the RV144 vaccine  
270 correlated with such V2 C  $\beta$ -strand-specific antibody responses. Remarkably, while the V1V2-  
271 H173 scaffolds bound strongly to both CH58 and CH59 antibodies, the V1V2-Y173 escape variant  
272 either failed to bind (CH59) or showed drastically reduced binding (CH58). The DSV deletion  
273 again did not show a significant alteration in the binding specificity (Fig 3B-D).

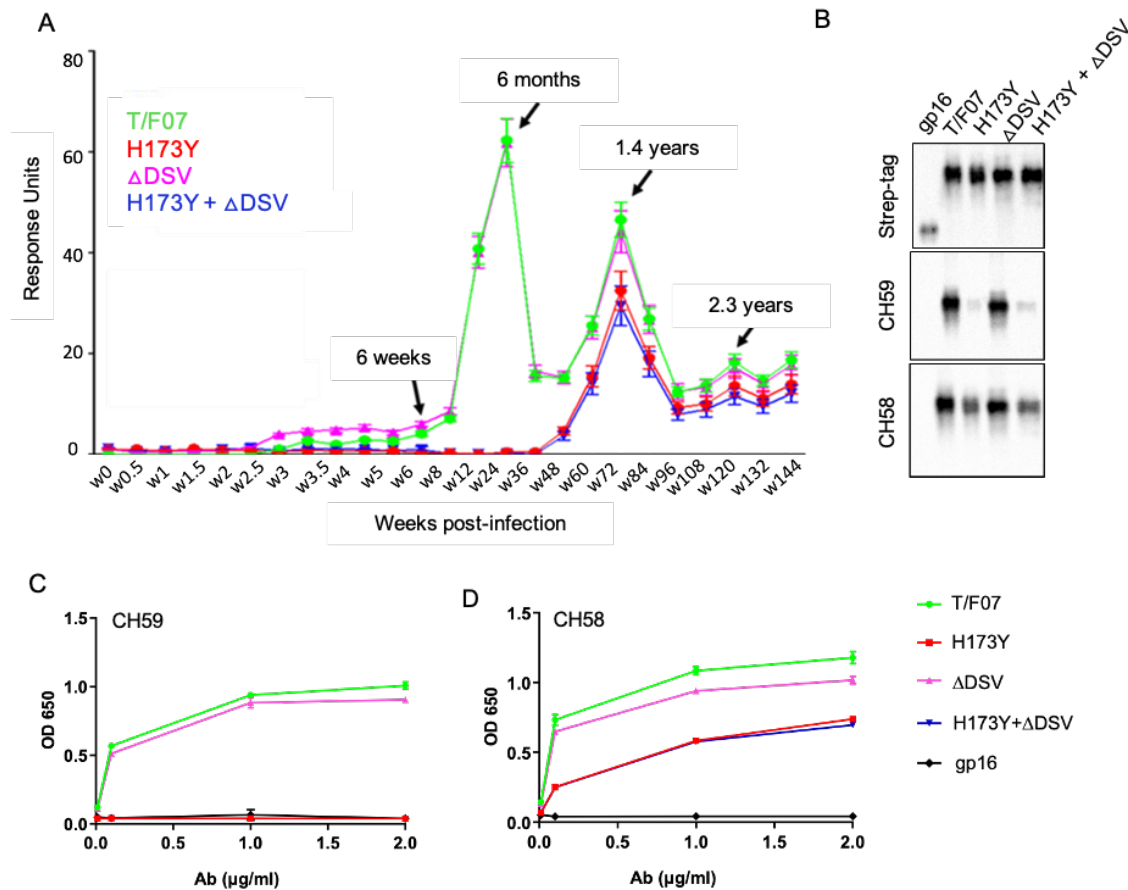

274

275 **Fig 3. H173Y mutation in T/F07 virus led to virus escape in the 40007 participant.** (A) SPR determined binding  
 276 curves showing reactivity of purified recombinant gp16-T/F07 (green), gp16-H173Y (red), gp16-ΔDSV (magenta)  
 277 and gp16-H173Y+ΔDSV (blue) V1V2 proteins with a series of longitudinal plasma samples collected from 40007  
 278 (shown on x-axis). The samples from wk 0 (pre-infection) until wk 144 (post-infection) were tested. The amount of  
 279 binding is proportional to the response units (RU) plotted on the y-axis. The corresponding time points for each peak  
 280 of antibodies are indicated with an arrow. An early wave of V2-specific antibody represented by first peak at 6-month  
 281 time-point recognized gp16-T/F07 and gp16-ΔDSV [H173 variants] but not to gp16-H173Y and gp16-H173Y+ΔDSV  
 282 [Y173 variants] implying H173Y mutation mediated viral escape. The second and third peaks of antibodies were  
 283 found to be reactive to both the variants. (B-D) H173Y mutants poorly react to CH59 and CH58 antibodies.  
 284 Immunoblot of the purified gp16 T/F07 V1V2 mutants (labeled on the top) showing respective binding with V2 mAbs,  
 285 CH59 and CH58. Recognition by Strep-tag (purification tag) antibody served as a protein loading control (B). Binding  
 286 curves of gp16-T/F07 (green), gp16-H173Y (red), gp16-ΔDSV (magenta), gp16-H173Y+ΔDSV (blue) V1V2-  
 287 proteins, and gp16 scaffold only (negative control) (black) showing reactivity to CH59 (C) and CH58 (D) mAbs, as  
 288 determined by ELISA.

289

290 We then evaluated antibody dependent cell cytotoxicity (ADCC) responses as these were  
 291 identified as one of the correlates for protection in RV144 vaccinees (31-33). We determined the  
 292 relative ADCC responses in the 40007 plasma against the C β-strand variants. We constructed

293 gp120 ectodomain versions of the V1V2 domain variants; gp120-H173 (T/F07), gp120-Y173 and  
294 gp120-Y173.ΔDSV (escape mutants), and gp120-92Th023 (control), expressed in GnTi cells, and  
295 purified the recombinant proteins. These were then coated on the target cells and ADCC killing by  
296 effector cells (healthy PBMCs) was measured by Granzyme activity using wk0, wk4 and wk24  
297 plasma samples of participant 40007. The data showed moderate ADCC responses against H173  
298 T/F07 while resistance to killing was observed for Y173 mutants, with the Y173.ΔDSV double  
299 mutant showing more resistance than the Y173 single mutant (Fig 4). This implicates a potential  
300 functional role for ΔDSV mutation against ADCC-type immune pressure, though it had no  
301 significant impact on recognizing the binding epitope(s). Furthermore, significant resistance was  
302 also observed for both the Y173 variants against CH58 mAb mediated ADCC killing, while no  
303 resistance was detected against a negative control CH65 Flu antibody.

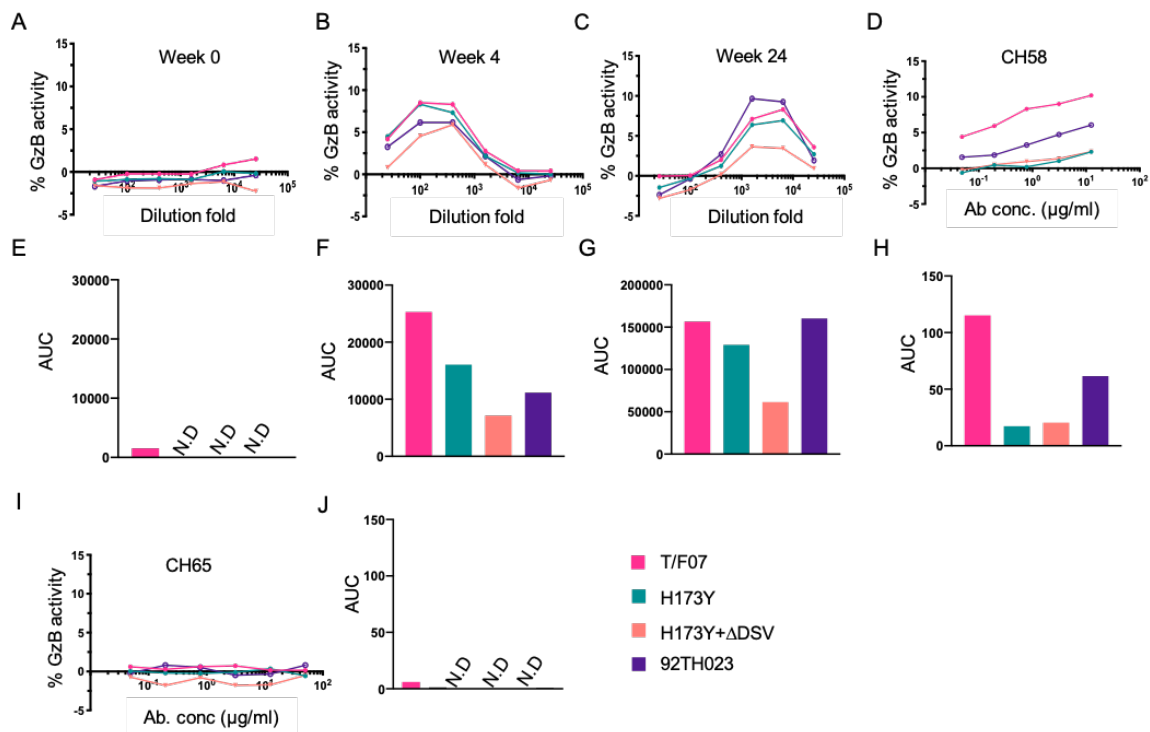

304

305 **Fig 4. ADCC responses in longitudinal plasma samples of participant 40007.** (A-C) ADCC responses at wk 0 (A,  
306 pre-infection), 4-wks post-infection (B), 24-wks post-infection (C) of 40007 plasma samples, measured as percentage  
307 Granzyme activity (y-axis), against gp120-T/F07 (pink), gp120-H173Y (teal), gp120-H173Y+ΔDSV (orange) and



308 control antigen, gp120-92TH023 (violet) coated target cells. (E-G) The corresponding area under curve (AUC) values  
309 for A-C graphs are shown for each curve. (D and I) CH58 (Positive control) (D) and CH65 (negative control) (I)  
310 mediated ADCC responses are shown. (H and J) Corresponding AUC values are plotted for panel D and I respectively.  
311 For CH65 and CH58 mAbs, 4-fold serial dilution starting at 50 µg/ml was used as shown on the x-axis. The 40007  
312 plasma samples from each visit were 5-fold serially diluted to determine the ADCC responses.

313

314 The above sets of data strongly implicate that the H173Y mutation in the diverged T/F07  
315 mutant population was due to selection against the early V2-directed host antibody responses that  
316 restricted the survival of T/F07 HIV-1 virus.

### 317 **Recapitulation of V2-specific human immune responses in mice**

318 We then hypothesized that the dramatic escape of H173Y mutant viruses might be because  
319 the histidine to tyrosine substitution caused a significant structural/conformational change in the  
320 C β-strand epitope such that it is no longer recognized by H173-specific antibodies. There is  
321 evidence that the C β-strand is conformationally dynamic and that it can take a helical form when  
322 bound to certain antibodies (34, 35). This is also consistent with the distinct specificities of human  
323 antibodies generated against these variants in participant 40007, i.e., strict specificity of T/F07  
324 plasma for H173 and increased breadth in the case of escaped plasma for both H173 and Y173  
325 (Fig 3). If so, could this be recapitulated through immunogen design, in the absence of viral  
326 infection? To address this question, we immunized BALB/c mice with V1V2 nanoscaffolds  
327 containing four different V2 variants; H173, Y173, ΔDSV, and Y173.ΔDSV, and analyzed the  
328 specificity of the elicited antibody responses (Fig 5A).

329 V2-specific antibody titers were determined by ELISA using the GnTi-expressed and  
330 purified His-tagged gp140 Env proteins containing the respective H173, Y173, ΔDSV, or  
331 Y173.ΔDSV mutations as coating antigens. The gp140 Env was used to evaluate V2 epitope  
332 specificity in a native context, and it also filtered out the gp16 scaffold-specific and strep-tag-  
333 specific antibody titers. The data showed that all the scaffolds elicited robust V2-specific

334 antibodies that recognized the V2 epitopes in the context of gp140 Env (Fig S3 and Fig 5B). This  
 335 is noteworthy because in previous reports, the V2 antibodies elicited against other scaffolded V2  
 336 immunogens did not recognize the V2 epitopes in gp140 envelope protein, though they recognized  
 337 the epitopes in the context of the respective scaffold used for immunization (36). The end point  
 338 titers were on the order of  $\sim 10^5$  in the immunized mice while the naïve controls showed no  
 339 significant V2-specific titers. These results demonstrated that the antigenicity and immunogenicity  
 340 behaviors of the V1V2 scaffolds are consistent with the retention of a native-like conformation.

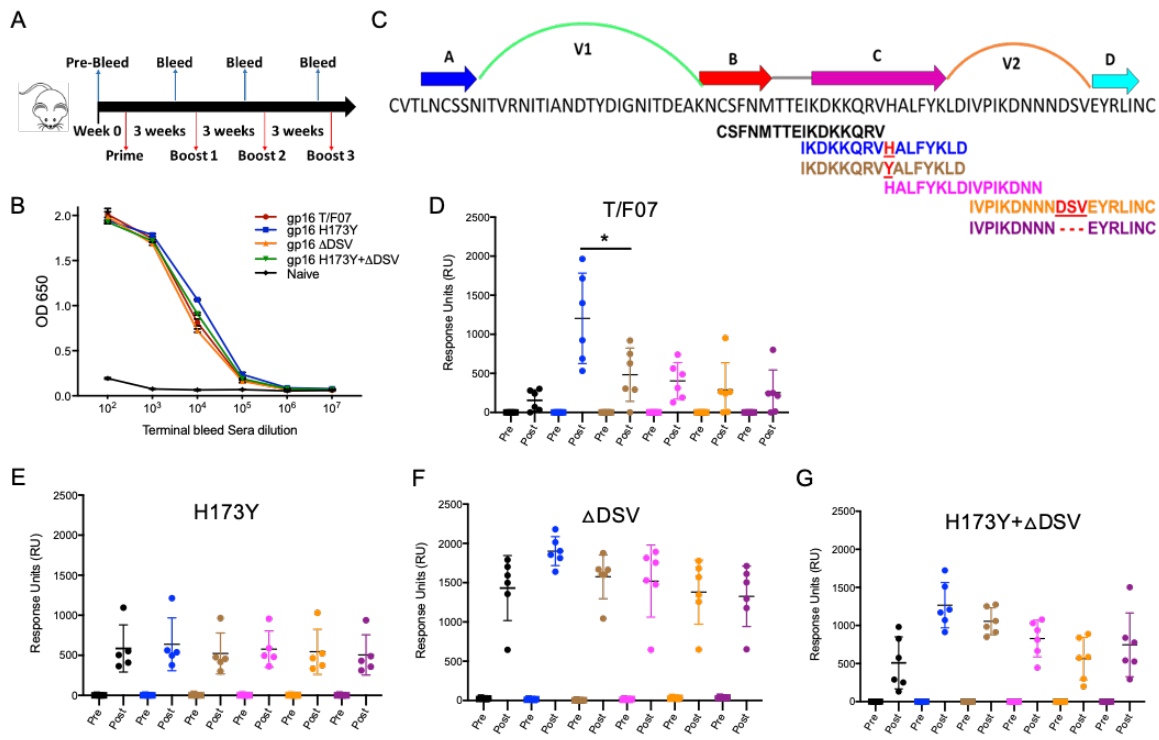

341  
 342 **Fig 5. Binding analysis of immunized mice sera with overlapping V2-peptides.** (A) Scheme of immunizations.  
 343 Prime plus 3-boost immunizations were performed at an interval of three wks. Pre-immunization sera were collected  
 344 as negative controls. (B) V1V2-specific responses in different immunized groups after the last immunization (terminal  
 345 bleed). Binding curves for each group are color-coded, provided in the legend on the right side of the graph. (C)  
 346 Schematic showing T/F07-V1V2 sequence labelled on top for A-D strands and hypervariable V1 and V2 loops. The  
 347 overlapping V2 peptides used for SPR binding analysis with immunized mice sera are shown in different colors. (D-  
 348 G) SPR binding responses shown for gp16-T/F07 (D), gp16-H173Y (E), gp16-ΔDSV (F), gp16-H173Y+ΔDSV (G)  
 349 immunized mice terminal (post) and pre-immunization sera (pre) (negative control) with specific V2 peptide  
 350 represented by the corresponding color of peptide as shown in (C). The binding signal is depicted in terms of response  
 351 units shown on the y-axis. P-value was determined through unpaired t-test, \* =  $p < 0.01$ .

352 We then tested the epitope specificity using a series of 15-mer biotinylated peptides  
353 spanning the C  $\beta$ -strand by a sensitive Biacore SPR assay (Fig 5C). Remarkably, the T/F07 H173-  
354 induced sera reacted strongly with H173 C-strand peptide but poorly with Y173 and other variant  
355 peptides (Fig 5D). In contrast, the escape mutant Y173-induced sera showed broad reactivity to  
356 both H173 and Y173 peptides as well as to other variant peptides containing C  $\beta$ -strand epitope.  
357 However, the level of reactivity of Y173 antibodies to peptides was low overall when compared  
358 to the same with gp140 Env proteins probably because these antibodies are conformation-specific  
359 (Fig 5E). Thus, the mice sera in principle recapitulated the behavior of H173 and Y173 antibodies  
360 produced in a human infection. Furthermore, we observed that the presence of  $\Delta$ DSV mutation  
361 enhanced and broadened the reactivity of the antibodies (Fig 5F-G). These results are consistent  
362 with the ADCC assays where the  $\Delta$ DSV mutation showed enhanced resistance to cell killing.

### 363 **Distinct specificities of antibodies induced by H173 and Y173 variants**

364 To further define the specificities of H173- and Y173-induced sera, we evaluated their  
365 ability to recognize HIV-1 Env proteins from different clades and determine their cross-reactivity.  
366 Accordingly, we constructed a series of recombinant clones and purified gp140 Env proteins from  
367 different clades including: CRF\_AE proteins T/F07-H173, T/F07-H173Y, T/F07- $\Delta$ DSV, T/F07-  
368 H173Y. $\Delta$ DSV, T/F61, T/F94, and T/F100, clade A [BG505], clade B [SF162 and JRFL], and clade  
369 C [1086] (Fig 6A). Their reactivity was tested using sera of mice immunized with the four V1V2  
370 nanoscaffolds (Fig S4). The data showed that the T/F07 H173- and  $\Delta$ DSV-induced antibodies  
371 reacted with autologous T/F07 Env proteins or clade C-1086 and clade AE244 strain antigens  
372 having C-strand sequence closely resembling to T/F07, whereas the antibodies induced by Y173  
373 and Y173. $\Delta$ DSV groups reacted broadly with all the proteins tested, and overall, more strongly  
374 than the T/F07-induced sera as shown by the heat map (Fig 6B). These data suggested that the

375 H173 immunogen induced antibodies with narrow specificity to C  $\beta$ -strand whereas the Y173  
 376 immunogen induced more broadly reactive antibodies.

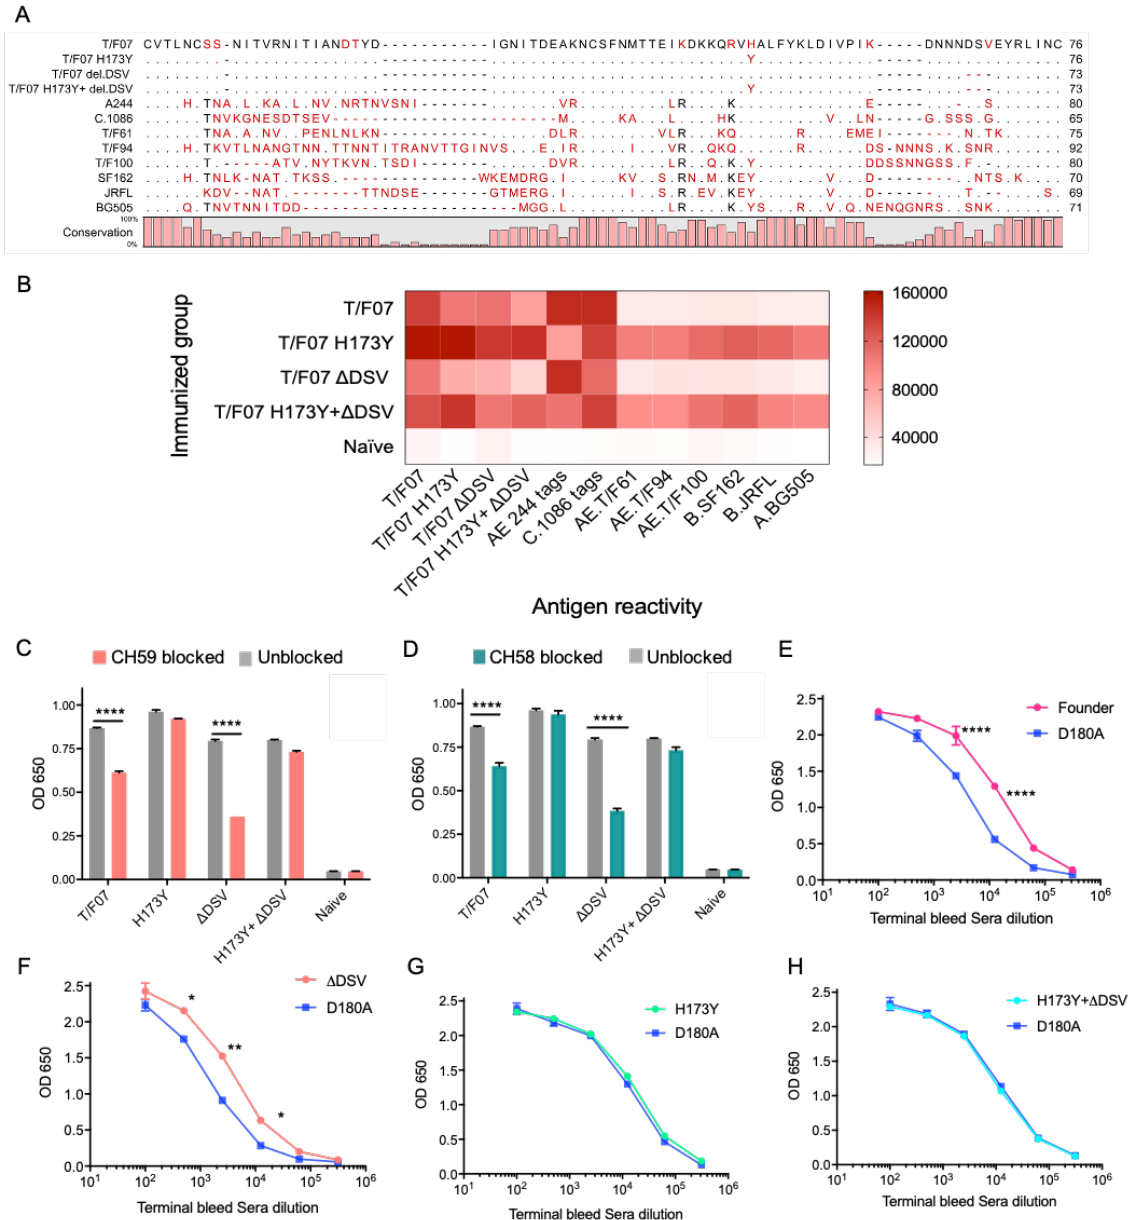

377

378 **Fig 6. H173 and Y173 V2-variants induce distinct antibody responses.** (A) Sequence alignment of V1V2 region  
 379 of all the antigens used in the cross-reactivity ELISA experiment. The sequences are compared with T/F07 V1V2  
 380 sequence. T/F07 matching residues are shown as dots and different residues are highlighted in red. Difference in the  
 381 lengths of hypervariable loops is shown by dashed lines (gaps). Degree of conservation is depicted graphically at the  
 382 bottom of the sequence alignment. (B) Heat-map showing cross-reactivity for each immunized group. The map is  
 383 generated based on AUC values calculated from the binding curves shown in fig S4 for each immunized group. The  
 384 antigens used in the binding experiment are labelled horizontally at the bottom of the heat-map. The mice groups are  
 385 labelled vertically on the left-side of the heat map. The color gradient scale on the right side shows the degree of

386 reactivity with corresponding numerical values. (C-D) In an antibody blocking assay, significant reduction in sera  
387 reactivity was observed in gp140 T/F07 coated wells pre-incubated/blocked with purified mAbs, CH59 (C, orange),  
388 and CH58 antibodies (D, teal), for gp16-T/F07 or  $\Delta$ DSV (H173 variants) but not gp16-H173Y or H173Y+ $\Delta$ DSV  
389 (Y173 variants) immunized mice groups, compared with the unblocked wells (gray). Titrated and optimized sera  
390 dilution was used for each group in this assay. (E-H) Sensitivity to D180A mutation. Binding curves showing reactivity  
391 of gp16-T/F07 (E), H173Y (F),  $\Delta$ DSV (G) and H173Y+ $\Delta$ DSV (H) immunized sera to respective autologous T/F07-  
392 gp140 (with matching V2 mutations) coating antigens (color-coded curves) versus T/F07 gp140-D180A mutant (blue  
393 curves). Binding is determined through ELISA. Triplicate absorbance (OD 650 nm) readings were used to generate  
394 binding curves. P-values were determined through unpaired t-test, \*\*\*\* =  $p < 0.00001$ , \*\*\* =  $p < 0.0001$ , \*\* =  $p <$   
395  $0.001$  and \* =  $p < 0.01$ .

396

397         Next, we tested whether the narrowly specific H173-induced antibodies are similar to  
398 CH58 and CH59 mAbs derived from RV144 vaccinees. Since the immunogen used in RV144 trial  
399 contains H173 and that the CH58 and CH59 mAbs specifically recognized H173 C  $\beta$ -strand  
400 epitope but not the Y173 variant, it is reasonable to hypothesize that H173, but not Y173, might  
401 induce CH58/59-like antibody responses. This was tested by blocking assays using CH58 and  
402 CH59 mAbs. The H173 gp140 Env antigen was coated on ELISA plates and after blocking by  
403 CH58 or CH59 mAbs, were exposed to H173 or Y173 mice sera. Remarkably, the H173 sera, but  
404 not the Y173 sera, with or without  $\Delta$ DSV, showed significant reduction in binding (Fig 6C-D).  
405 Furthermore, since CH58 and CH59 binding is sensitive to mutation at D180 residue that is  
406 adjacent to C  $\beta$ -strand (35), we evaluated its binding. Consistent with the above antibody blocking  
407 data, binding of H173-induced antibodies but not of Y173-induced antibodies was significantly  
408 more sensitive to D180A mutation (Fig 6E-H). Overall, these data suggest that the presence of  
409 histidine at position 173 favors induction of CH58/59-like antibodies elicited by RV144 vaccine.

410         The above datasets show that the mouse H173-induced antibodies, like their human  
411 counterparts, are narrowly specific to the autologous C  $\beta$  strand and hence sensitive to sequence  
412 variation. Conversely, the Y173-induced antibodies are broadly reactive, conformation-requiring,  
413 and cross-reactive to diverse V2 domains that differ in length, sequence, and glycosylation.

414 Furthermore, these antibodies also tolerate variations in C  $\beta$ -strand sequence not only at 173  
415 position but also at other critical positions such as K168 or K169 (12, 35).

#### 416 **Structural analyses indicate conformational switching in virus escape**

417 To determine if the mutational switch involved in virus escape might be due to a  
418 conformational switch in C  $\beta$ -strand, we performed Molecular Dynamics (MD) simulations and  
419 structural modeling analyses of H173- and Y173-V1V2 domains. For MD simulations, we first  
420 modeled H173- and Y173 V1V2 domains based on our recently published cryo-EM structure of  
421 CRF\_AE T/F100 HIV-1 Env trimer as template (PDB ID: 6NQD), due to extensive sequence  
422 similarity (87.6%) (30), using MODELLER 9v7 (37). Both of these V1V2 domains assumed  $\beta$ -  
423 stranded conformation matching the template. The V1V2 domains were extracted to run  
424 simulations using GROMACS 5.1.2 (38) and trajectories were produced for 100 ns with 2fs time  
425 step. We explored how H173 and Y173 strand V1V2 models undergo changes in conformation  
426 over time.

427 In H173/Strand but not in Y173/Strand trajectory, helix content increased over time,  
428 though the  $\beta$ -pairing within the domain remained stable. In contrast to H173/Strand trajectory,  
429 Y173/Strand trajectory displayed a dynamic and fluctuating  $\beta$ -strand content (Fig 7A, left). We  
430 further investigated how V1V2 conformation would change if C-strand was helix in the initial  
431 conformation. To construct a helix initial model, helical restraints were put on residues, 167-176  
432 (DKKQRVH/YALF), following the helical conformation of the published crystal structure of  
433 V2/C-strand peptide (PDB ID: 4HPO). The helical structures were also modeled using  
434 MODELLER 9v7. Different from the strand conformation simulations, trajectories with helix  
435 initial conformations showed unstable trajectories for both H173 and Y173 V1V2 domains. The  
436 overall  $\beta$ -strand content increased around 30 ns in both the simulations (Fig 7A, right). However,

437 while helix in Y173/Helix model was fully unwound during simulation, one turn encompassing  
438 residues 166-171 remained in H173/Helix until the end of the trajectory (Fig 7B-C). Furthermore,  
439 the unwound region of H173/Helix but not Y173/Helix model could still engage into  $\beta$ -pairing.  
440 Overall, the MD simulations data suggested distinct conformational dynamics for H173 and Y173  
441 V1V2 domains with the latter being relatively more dynamic. Furthermore, while the conserved  
442  $\beta$ -sheet conformation is thermodynamically favored and hence predominates for V1V2 domain,  
443 H173/C-strand region could tolerate helical constraint owing to the stable  $\beta$ -pairing in the rest of  
444 the domain.

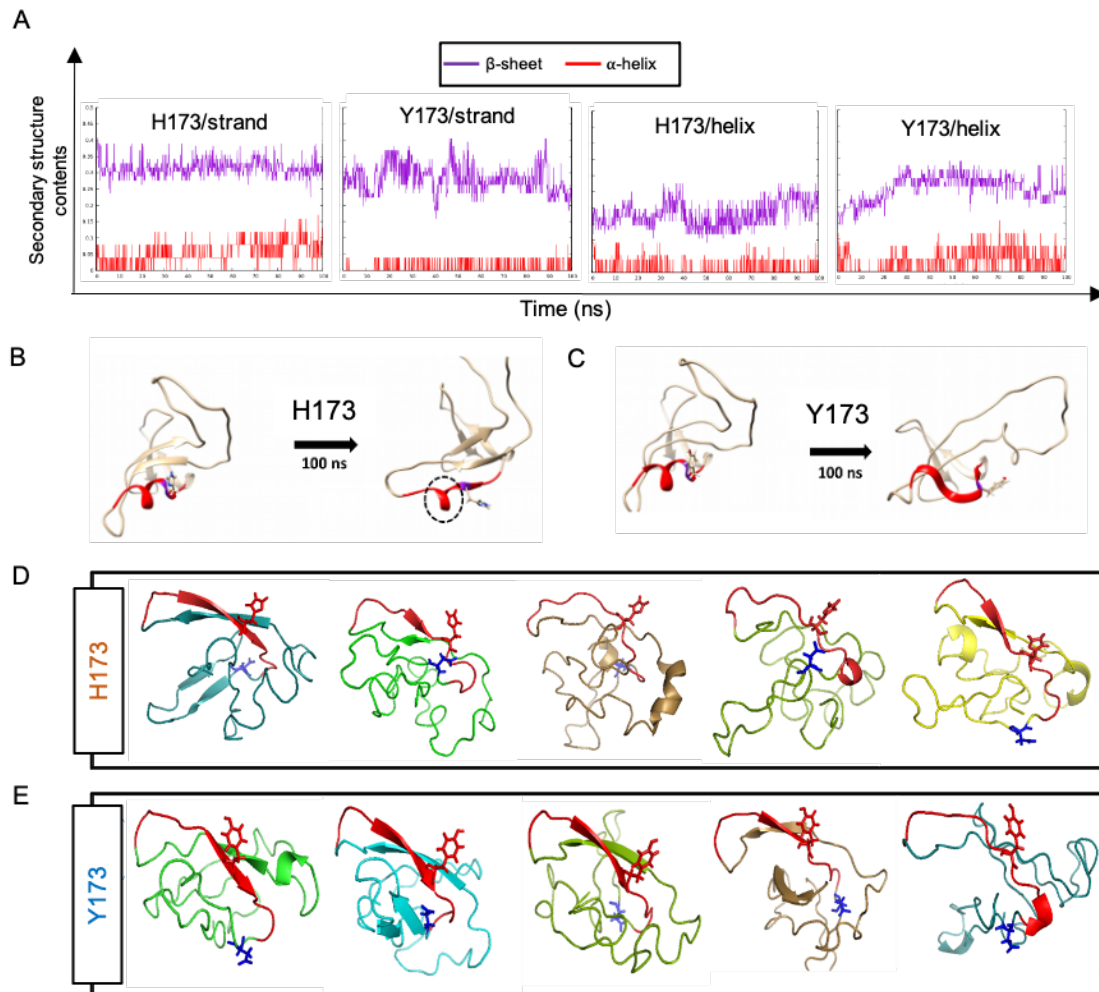

445

446 **Fig 7. Structural analyses of H173 and Y173-V1V2.** (A) Secondary-structure content variation as a function of time  
447 (ns) initiated with V2/strand conformation (left) and V2/helix conformation (right) of H173 and Y173 V1V2 models  
448 during MD simulation.  $\beta$ -sheet content (purple) and  $\alpha$ -helix content (red) changes are depicted over the 100 ns time-  
449 course of simulation. (B-C) Initial (left) and final (right) structures of the V2/helix trajectory for H173 (B) Y173 (C)  
450 V1V2 models. Histidine and tyrosine side chain is shown in the model with C-strand highlighted in red. A portion of  
451 the helix remains stable (encircled by black dashed lines) at the end 100 ns simulation time in H173/helix trajectory.  
452 (D-E) *Ab initio* structure modelling of H173 and Y173 V1V2 domains. Five models were generated through QUARK  
453 modelling tool for H173-V1V2 (D) Y173-V1V2 (E). C-strand is colored in red with sidechain shown for residue 173.  
454 Sidechain for residue 180 (critical for helix/coil V2-conformation recognizing CH58/59 like antibodies) is shown in  
455 blue.

456

457         Since the template-based modeling tends to get biased towards the template structure, we  
458 next performed structural modeling of H173 and Y173 V1V2 domains using a modelling tool  
459 QUARK (39) that generates *ab initio* structure predictions based on physical principles rather than  
460 previously resolved structures as templates. Five 3D models depicting possible conformations  
461 were generated for each V1V2 variant based on replica-exchange Monte Carlo simulation under  
462 the guide of an atomic-level knowledge-based force field. It was found that only one of the five  
463 H173-V1V2 models depicted C-strand as  $\beta$ -strand, while the rest showed a coil plus a short  $\beta$ -  
464 strand or a full coil conformation (Fig 7D). In contrast, four of the five Y173-V1V2 models  
465 depicted C-strand in  $\beta$ -stranded conformation while only one model showed this region to assume  
466 coil conformation (Fig 7E). Overall, these models indicate that H173Y mutation has the potential  
467 to cause a structural change in the C  $\beta$ -strand thereby altering the conformational dynamics of the  
468 V1V2 domain. Furthermore, notably, models of both the variants depicted the C strand as  $\beta$ -strand  
469 to some degree which represent the conserved Greek key motif captured by all the resolved Env  
470 trimer structures. However, the degree of  $\beta$ -stranded character was identified to be much higher in  
471 Y173 than in H173 variant. Hence, it is plausible that the observed antibody evasion and virus  
472 escape that occurred in participant 40007 was due to a structural transition in this V2 epitope, from  
473 helix to  $\beta$ -strand owing to H173Y mutation.

474



## 475 **A combinatorial approach to V2 domain vaccine design**

476           The H173Y mutation leading to structural transition, viral escape, and induction of broadly  
477 reactive antibody species provided a conceptual basis to design an ensemble of V2-conformation  
478 variants that can potentially induce even more broadly cross-reactive V2 antibodies that might be  
479 difficult for the virus to overcome without compromising survival fitness. Therefore, we developed  
480 a combinatorial approach to create an ensemble of V2 variants that might also mimic the natural  
481 diversity of HIV-1.

482           First, we sought to identify the potential escape sites in the semi-conserved C  $\beta$ -strand,  
483 deliberately excluding the loop region that primarily generates strain-specific immune responses.  
484 HIV sequence database was explored to extract 100 Env sequences from each of the major  
485 geographically prevalent HIV subtypes including A, B, C, and AE. These sequences were  
486 individually aligned using CLC Main Workbench and the partly conserved C strand sequence  
487 alignment was extracted to generate a consensus logo (Fig 8A). Subsequently, sites of highest  
488 variability were identified in the consensus logogram with the rationale that a less conserved or  
489 highly variable site is likely to be linked to viral escape. This resulted in the prediction of four  
490 residues-at amino acid positions 166, 169, 170, 171 as highly variable. Then, primers were  
491 designed such that the most common variants in the natural HIV-1 population, lysine (K), arginine  
492 (R), or glutamine (Q), were incorporated at each of these positions to generate a combinatorial  
493 library (Fig 8B). The resultant library encompassed 54 V2-variants representing the V2  
494 conformations prevalent in the HIV population. The rationale behind choosing naturally selected  
495 mutations is not only to represent diverse HIV strains but to also ensure the structural and  
496 functional integrity of the V1V2 domain, thereby presenting only the most relevant epitope  
497 diversity to the immune system.

498 Three different combinatorial gp16-V1V2 nanoscaffold libraries were constructed in the  
499 background of H173, Y173, and Y173.ΔDSV templates. Deletion of V1 or V2 loop has previously  
500 been shown to modulate immunogenicity of the Env protein and subsequent antibody responses  
501 (40-42). Hence, we constructed a fourth library using Y173 template in which a 15-amino acid  
502 residue mutational hotspot in the V1 loop (SNITVERNITIANDTYD) was replaced with a flexible  
503 linker (AGGAS), the length of which was optimized through *insilico* structural modeling to have  
504 a minimal effect on the V1V2 backbone conformation. This Y173.ΔV1 library is also supposed to  
505 eliminate certain immunodominant residues in the V1 loop and enhance V2-directed antibody  
506 responses. These four combinatorial libraries plus two original H173 and Y173 V2 immunogens  
507 as controls, all as gp16 nanoscaffolds were constructed and expressed in GnTi cells and the  
508 recombinant proteins were purified. To minimize epitope distraction, the Strep-tags were removed  
509 using HRV3c protease cleavage site engineered into each of the constructs and the protease was  
510 separated by size-exclusion column chromatography (Fig S5). The pure tag-less nanoscaffolds  
511 were then used for mouse immunizations and induction of V2-specific antibodies was evaluated.

### 512 **Combinatorial immunogens broaden V2 antibody responses**

513 BALB/c mice were immunized at wks 0, 3, 6, and 12 with pure V2 immunogen libraries  
514 as described above (Fig 5A). Naïve mice (PBS/no antigen) and mice immunized with gp16-  
515 scaffold alone (without V2) served as negative control groups. Sera were collected after the final  
516 boost and analyzed by a series of immunological assays.

517 V1V2-specific antibody titers were quantified by ELISA using the respective purified  
518 proteins as coating antigens. V1V2 antibodies were detected after prime immunization and  
519 enhanced by several fold with each successive boost for all the groups except for the negative

520 control groups where no V2-specific responses were detected. The terminal bleed sera having the  
521 maximum antibody titers were then used for detailed epitope specificity studies (Fig S6).

522 To determine the breadth of responses, a series of ~20 heterologous recombinant gp140  
523 and gp120 Env proteins from diverse HIV subtypes A, B, AE and C were used as coating antigens  
524 for ELISA assays. Many of these were purified from GnTi cells while some were obtained from  
525 NIH Reagent Program (Fig S7A-C and Table 1). These Env proteins differed in sequence  
526 composition of V1V2 domain C  $\beta$ -strand with significant differences in the length, sequence, and  
527 glycosylation of their hypervariable V1 and V2 loops (Fig S7D). All of these recombinant proteins  
528 were used as coating antigens to determine the cross-clade antibody responses generated by  
529 different combinatorial libraries (Fig S8).

530 Consistent with the first mouse study, the Y173-induced antibodies showed greater cross-  
531 reactivity than the H173-induced sera, as shown by their binding to majority of the heterologous  
532 Env proteins. In contrast, H173-induced sera strongly reacted with Env antigens from A244,  
533 93TH75, 1086 and CM235 strains that contained similar C  $\beta$ -strand sequence as the T/F07 virus,  
534 while showing moderate to poor reactivity with the rest of the Env antigens as depicted in the heat  
535 map (Fig 8C). Upon grouping the antigens into T/F07 matched and mis-matched C  $\beta$ -strand  
536 sequence, H173 antibody responses were more sensitive to mismatches in the C  $\beta$ -strand region  
537 than the Y173 antibodies (Fig 8D). Cumulative response towards all the antigens was also  
538 compared for H173 and Y173 groups by plotting the summarized response based on AUC values  
539 (%) (Fig 8E). These data clearly showed that with single residue change, H173Y, there occurred  
540 significant improvement in recognition of diverse Env antigens and hence breadth of V2 reactivity.

541 The combinatorial H173-induced antibodies, like the H173-induced antibodies, were  
542 significantly inhibited by CH58 antibodies while no significant inhibition was observed for sera

543 induced by Y173 or Y173 combinatorial groups (Fig 8F). These data suggest that histidine at 173  
 544 position plays a dominant role in influencing the conformation even in the context of a library of  
 545 V2 variants. Furthermore, since CH58 recognizes V2 region as  $\alpha$ -helix, it is consistent with our  
 546 analyses described above that the H173 immunotype has more propensity for helical conformation  
 547 over  $\beta$ -strand (Fig 8G).

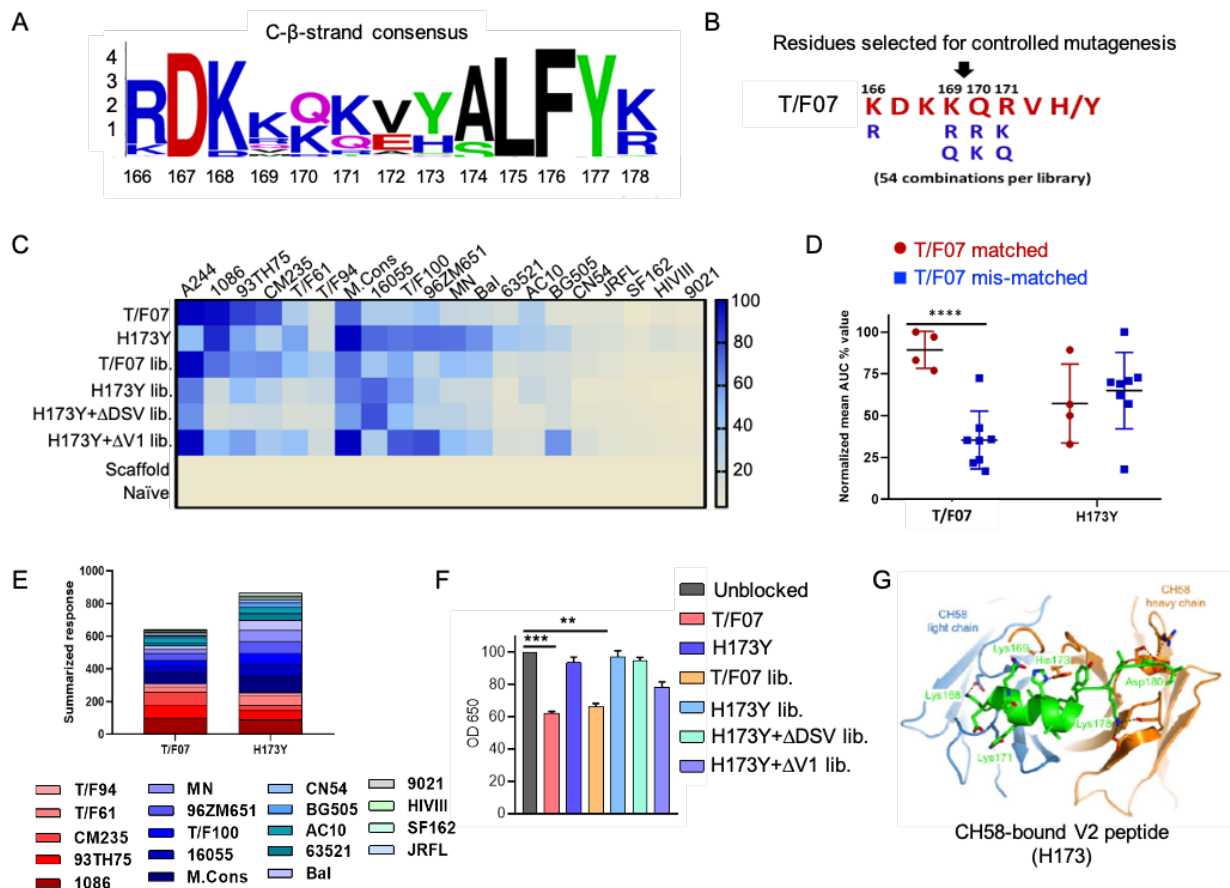

548

549 **Fig 8. Combinatorial and non-combinatorial V2-immunogens induce differential breadth and antibody**  
 550 **responses.** A) Consensus logo of C- $\beta$ -strand (residue 166 to 178) of the V1V2 region generated using 100 *env*  
 551 sequences each of clade A, B, C, D and AE. The size of the letter depicting residue in the logo is proportional to its  
 552 conservation across viral sequences under analysis. B) Four highly variable residue positions (166, 169, 170 and 171)  
 553 were selected for combinatorial mutagenesis with additional substitutions shown in blue to generate V2-combinatorial  
 554 libraries. C) Heat-map showing binding of sera from different immunized mice groups to diverse HIV-1 Env antigens.  
 555 Percent AUC values derived from the binding curves and normalized to autologous antigen binding response were  
 556 used to generate the heat-map. The antigens used in the binding experiment are labelled horizontally at the top of the  
 557 heat-map. The immunized mice groups are labelled vertically on the left-side of the heat map. The color gradient scale  
 558 on the right side shows the degree of reactivity with corresponding AUC percent values. D) Effect of C-strand  
 559 sequence variation on the binding of T/F07 and H173Y immunized groups' sera. Scatter plot showing significant

560 difference in the reactivity of gp16-T/F07 but not H173Y immunized sera with Env antigens having C-strand sequence  
561 closely matching (red spheres) versus mismatching (blue squares) to T/F07. Normalized mean AUC (%) values are  
562 plotted on the y-axis estimated from the binding curve for each antigen represented as sphere or square in the graph  
563 (each sphere or square represent different antigen). E) Cumulative AUC (%) values are plotted for T/F07 and H173Y  
564 groups to display the summarized or total response from all the diverse antigens in the library. Each antigen is depicted  
565 as a small rectangle colored with respect to the key provided at the bottom of the graph. Binding to each antigen  
566 corresponds to the area of rectangle in the bar graph. F) CH58 antibody blocking assay data. Significant reduction in  
567 sera reactivity was observed for T/F07 and T/F07 library groups when gp140 T/F07 coated wells were pre-  
568 incubated/blocked with purified mAb, CH58 (grey) compared to unblocked (pink). No statistically significant  
569 inhibition of binding signal was observed for any H173Y-based immunogen groups. P values determined using  
570 unpaired t-test, \*\* =  $p < 0.01$  and \*\*\* =  $p < 0.001$  (significant difference). G) Crystal structure of V2 peptide with  
571 H173 (bright green) bound to mAb CH58 (orange) (PDB ID: 4HPO). The image is adapted from Liao et al. (Liao et  
572 al., 2013). CH58 recognize C-strand of V2 region as an  $\alpha$ -helix.

573

574           Finally, unlike the H173 group, the combinatorial H173 group showed relatively broader  
575 responses, with much improved binding to Env antigens such as T/F61, T/F94, T/F100, MN and  
576 Bal. Hence, H173 library-based vaccine candidates led to enhanced recognition of other Env  
577 proteins. With respect to Y173 and Y173. $\Delta$ DSV combinatorial libraries, strong binding was seen  
578 with all Y173 antigens and moderate reactivity towards H173 bearing antigens. On the other hand,  
579 notably, the sera induced by Y173. $\Delta$ V1 combinatorial library showed strong overall binding to  
580 both H173 and Y173 antigens. Though the breadth of reactivity for this group was comparable to  
581 a non-combinatorial Y173 group, it represented a distinct binding profile because of its stronger  
582 reactivity to most of the Env antigens such as A244, T/F100, 96ZM651, and BG505 than the  
583 H173Y group containing the V1 loop (Fig 8C). Thus the Y173. $\Delta$ V1 libraries containing both the  
584 Y173 mutation and V1 loop deletion might be considered the most effective design for the greatest  
585 breadth and strength of the V2 domain antibodies.

## 586 **Discussion**

587           The modest 31.2% efficacy of the only successful RV144 HIV vaccine trial in Thailand  
588 was correlated with the induction of V2-directed antibodies (10, 17, 35, 43). Analysis of  
589 breakthrough infections of vaccinees showed mutations in the V2 domain of the circulating

590 viruses, presumably selected for their ability to survive under the host immune pressure. If the  
591 antibody responses had increased breadth, vaccine efficacy would have been greater, and it would  
592 have minimized the emergence of viral escape mutants. Hence, increasing the breadth of vaccine-  
593 induced V2 response remained as one of the critical goals of HIV-1 vaccine design. Here, we  
594 report detailed analysis of a genetic shift of a transmitted/founder HIV-1 virus through viral escape  
595 that guided the design of combinatorial V2 immunogens for increased breadth and cross-reactivity.

596         Phylogenetic analyses of T/F viruses in longitudinal samples of RV217 ECHO trial  
597 participant 40007 identified a remarkable, near-complete genetic shift of virus population at 24-  
598 wk post-infection. The viruses carried a histidine to tyrosine substitution at position 173 of the  
599 semi-conserved C  $\beta$ -strand of the V2 domain. This shift coincided with a “wave” of H173-epitope  
600 specific antibodies produced by the host immune system. That the Y173-epitope showed no  
601 detectable reactivity to these antibodies while the H173 epitope reacted strongly gave a clear  
602 indication that the Y173 substitution was an escape mutant selected for its survival under strong  
603 immune pressure. Furthermore, the Y173 epitope either did not bind, or bound poorly, to CH58  
604 and CH59 mAbs isolated from RV144 vaccinees. These antibodies are also directed to the same  
605 C  $\beta$ -strand and recognize H173 as a critical residue. In fact, two of the three vaccine immunogens  
606 (A244 and 93TH023) used for RV144 trial has histidine at 173 position, explaining the H173  
607 specificity of these vaccine induced CH58 and CH59 antibodies.

608         Neither the 40007 T/F sera nor the RV144 vaccine sera or the CH58 and CH59 mAbs,  
609 exhibited strong virus neutralizing activity, but the latter exhibited strong ADCC activity which  
610 correlated with reduced infection in immune correlate analysis (31-33). Similarly, in our current  
611 study, the Y173 escape mutant which also consisted of an additional DSV tripeptide deletion in  
612 the adjacent variable V2 loop showed significant resistance to ADCC mediated killing when

613 compared to the H173 epitope. The DSV deletion alone otherwise had no effect on the binding of  
614 the C  $\beta$ -strand epitope to antibodies in ELISA or SPR binding assays, yet it was co-selected along  
615 with the Y173 mutation. This leads to a compelling argument that the strong immune pressure  
616 exerted by the host might be due to the ADCC activity of the elicited antibody responses, which  
617 is consistent with previous reports suggesting the importance of ADCC responses in HIV-1  
618 infected individuals particularly the elite controller, and protection imparted by vaccines in non-  
619 human primates (44-48).

620 Intriguingly, a second wave of antibodies with greater breadth emerged following the H173  
621 to Y173 genetic shift and disappearance of the H173-specific first wave antibodies. Unlike the  
622 latter, the second wave antibodies bound equally well to both H173 and Y173 C  $\beta$  strand epitopes,  
623 as analyzed by multiple assays including the sensitive SPR assay. Notably, the H173 residue is at  
624 the center of the C  $\beta$  strand that contains hydrophilic and solvent-exposed residues flanking on one  
625 side and hydrophobic and buried residues on the other side. A H173Y mutation could therefore  
626 have significant structural consequences. Previous X-ray structures showed that the H173 peptide  
627 epitope assumes an  $\alpha$ -helix when bound to CH58 and CH59 antibodies as opposed to a  $\beta$ -strand in  
628 the envelope proteins with tyrosine at residue 173. Furthermore, prevalence of H or Y residues at  
629 this position among numerous Env sequences in the database argues for functional importance of  
630 this site in HIV-1 evolution. Thus, it appears that the H173Y genetic shift in T/F07 HIV-1 virus  
631 may have caused a significant structural/conformational change in the C  $\beta$  strand epitope, which  
632 led to induction of the second wave antibodies with distinct specificity, with greater breadth than  
633 the first wave antibodies.

634 Remarkably, the differential immunological response observed in the human immune  
635 system was basically recapitulated in a mouse model. First, the gp16-V1V2 nanoscaffolds elicited

636 antibody responses in mice that recognized the respective V2 epitopes in the context of gp120 or  
637 gp140 envelope protein structures. This is significant not only because antibodies induced by most  
638 other scaffolded V2 domains do not bind well to the envelope proteins but also that it indicates  
639 that the gp16-scaffolded V2 epitopes are displayed in a native-like conformation. Second and more  
640 important, the H173 and Y173 variants induced antibodies with distinct specificities, similar to  
641 that observed in the human system. While the H173-induced antibodies strongly reacted with the  
642 autologous peptide but not with the Y173 peptide, the Y173-induced antibodies exhibited broad  
643 reactivity to both the peptides. This differential response was also observed in their reactivity  
644 towards diverse HIV-1 Env proteins. While the H173 antibodies were sensitive to mismatches or  
645 sequence diversity in the C  $\beta$ -strand, the Y173 antibodies showed cross-reactivity to a variety of  
646 Env proteins. Third, the H173 antibodies but not the Y173 antibodies competed with the RV144  
647 CH58 and CH59 mAbs for binding to the C  $\beta$  strand epitope.

648         The picture that emerges from the above observations, combined with the previously  
649 reported studies, is that the C  $\beta$ -strand region is conformationally dynamic and probably undergoes  
650 a structural transition when H 173 changes to Y, from a  $\beta$ -strand conformation as part of conserved  
651 Greek motif to an  $\alpha$ -helix/helix-coil conformation (28, 34, 35). Our MD simulations and *ab initio*  
652 structural modeling of H173 and Y173 V1V2 domains further suggest that the H173 region is rigid  
653 and assumes a helical/coil conformation whereas the Y173 domain is more dynamic, preferring to  
654 be  $\beta$ -stranded and part of a  $\beta$ -sheet core. Thus, it is imperative to include both these structural  
655 forms in any vaccine design for increasing the breadth of antibody responses. In fact, a pentavalent  
656 vaccine containing five Env proteins including both the H173 and Y173 variants gave better  
657 protection in non-human primates when compared to single immunogen (33).



658           Given the above considerations, we rationalized that a vaccine to be highly effective, it  
659 should not only contain the H173 and Y173 variants, but it should also include additional most  
660 commonly found mutations that could fine-tune the conformation, some of which might have  
661 arisen as escape mutants against host immune pressures in past infections. Furthermore, presenting  
662 these variants as gp16 scaffolds would be ideal because, not only does this eliminate nonspecific  
663 distraction to other nonessential epitope sites of the Env but also that the gp16-scaffolded V1V2  
664 domains, as discussed above, elicit antibodies that recognize the C  $\beta$ -strand epitopes in a native  
665 context. Therefore, a combinatorial vaccine design was developed by including both the H173 and  
666 Y173 variants, each in addition carrying combinations of the most commonly found substitutions  
667 in the C  $\beta$ -strand as informed by sequence analyses. These in some respects mimic the natural V2  
668 conformations humans are exposed at the site of entry. Assessment of the antibody responses in  
669 the mouse model showed that, indeed, these enhanced the breadth significantly in all the libraries  
670 containing cocktails of variants when compared to the respective single immunogen controls.  
671 However, the breadth is greater in the context of Y173 when compared to H173, particular when  
672 Y173 was combined with a partial deletion of V1 loop. The greater breadth and cross-reactive  
673 responses resulted from the Y173- $\Delta$ V1 library was likely due to reducing the immunodominance  
674 of V1 epitopes as well as generation of breadth favoring conformational variants generated by  
675 Y173 switch. Consistent with these data is the recent report that responses directed to V1 loop  
676 interferes with binding of protective V2-directed antibodies to Env and promotes virus acquisition  
677 in SIV vaccinated macaques (25). Furthermore, we found that the H173 combinatorial library  
678 groups induced antibodies similar to CH58 mAb as shown by the CH58 blocking data. Induction  
679 of such a response despite additional mutations in the C  $\beta$ -strand argues for a dominant role the  
680 H173 residue plays to assume helical conformation as is also recognized by CH58 antibody (35).

681 These data lead to a model (Fig 9) implicating the conformational dynamism in the V2 region  
682 responsible for virus escape or breakthrough infections. This could potentially be curtailed by  
683 combinatorial vaccine designs such as the Y173- $\Delta$ V1 library of immunogens as future vaccine  
684 candidates to induce antibody responses with substantial increase in breadth and cross reactivity  
685 to enhance vaccine efficacy and minimize virus escape.

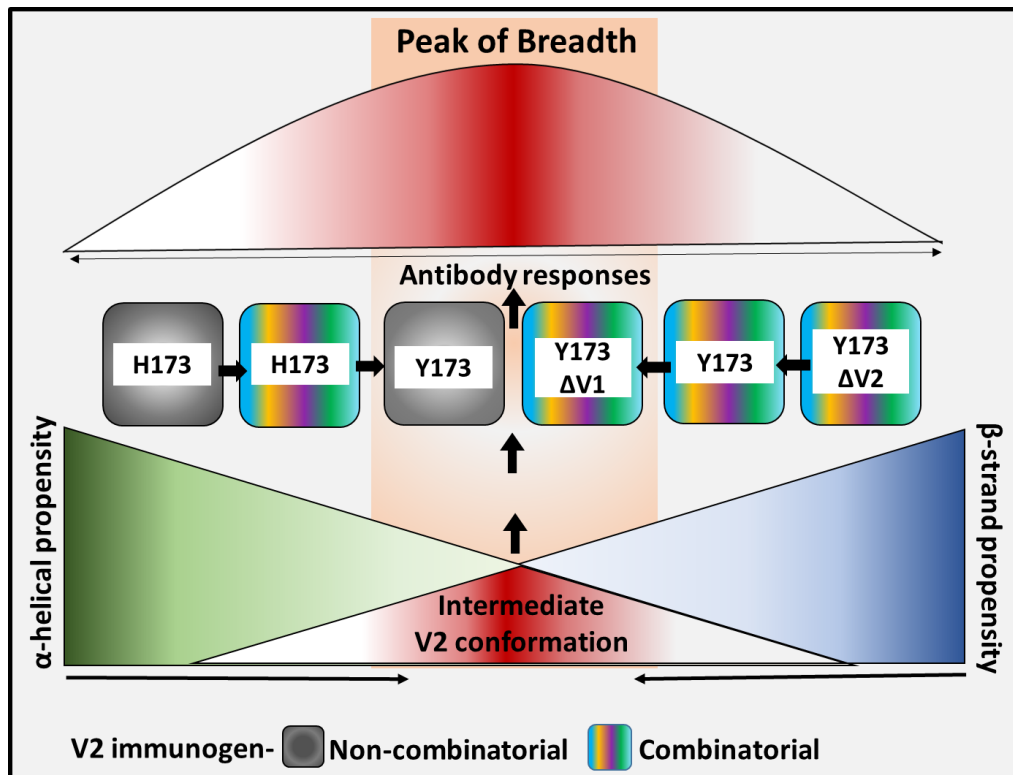

686

687 **Fig 9: Model of the study.** The viral escape observed owing to H173Y mutation during natural infection, and  
688 induction of distinct antibody responses by V2 immunogens: H173, Y173 and H173/Y173-based combinatorial  
689 libraries, implies that residue 173 has a prominent role in governing the dynamics of the V2 region. The current study  
690 shows that V2 immunogens can be categorized into 3 conformational variants based on their propensity to assume:  
691 helical/coil conformation,  $\beta$ -strand conformation and possibly a more dynamic intermediate conformation switching  
692 between beta/helix conformations. The antibody responses of these V2 variants represent a specific pattern of  
693 reactivity recognizing H173 or Y173 or both antigens. Each of the combinatorial and non-combinatorial V2  
694 immunogens studied here are aligned with respect to their plausible conformation and generated extent of breadth, in  
695 the above schematic diagram.

696

697

698

## 699 **Materials and Methods**

### 700 **Ethics statement**

701 All mice were maintained in the pathogen-free animal facility at the Catholic University of  
702 America, Washington, D.C. All animal protocols conducted for the current study were reviewed  
703 and approved by the Institutional Animal Care and Use Committee (IACUC) at the Catholic  
704 University of America.

### 705 **Viral Load Analysis**

706 Viral loads were determined in patient 40007 longitudinal samples from wk 0 up to wk 144 as  
707 described previously (11, 49). Briefly, viral RNA was isolated from cell-free plasma using the  
708 QIAamp viral RNA isolation kit (Qiagen) and quantitated. Quantitative reverse transcription-PCR  
709 was conducted in a two-step process. First, RNA was reverse transcribed followed by treatment  
710 with RNase H (Stratagene) for 20 min at 37°C and then cDNA was quantified using specific  
711 amplification primers, dyes and probes. All reactions were carried out on a 7300 ABI real-time  
712 PCR system with TaqGold polymerase (Applied Biosystems) according to the manufacturer's  
713 protocols.

### 714 **Single genome amplification (SGA)-derived envelope sequencing**

715 SGA sequencing was performed at viral sequencing core in Walter Reed Army Institute of  
716 Research (WRAIR) and conducted as described previously (11, 50). Briefly, viral RNA was  
717 extracted from the plasma of the infected RV217 participants using the QIAamp Viral RNA Mini  
718 Kit (QIAGEN, Valencia, CA, USA) and complementary DNA (cDNA) was synthesized using the  
719 SuperScript III RT kit (Invitrogen/Thermo Fisher Scientific, Waltham, MA, USA) following the  
720 manufacturer's instructions. cDNA was amplified as a full genome or 2 half genomes overlapping

721 by 1.5 kb as previously described using SGA strategy, which was then end-point diluted in 96-  
722 well plate, such that to yield less than 30% amplification product. Env specific primers were used  
723 to amplify *env* gene from the HIV genome.

#### 724 **Phylogenetic analysis**

725 Multiple sequence alignment and construction of phylogenetic trees were done using CLC Main  
726 Workbench (ver. 7.6.1) software. SGA derived *env* sequences obtained from various time points  
727 (1-, 4-, 24-wk post-infection) were aligned with the respective T/F virus sequence using following  
728 parameters; Gap Open Cost = 10.0; Gap Extension Cost = 1.0; and Alignment Sensitivity = Very  
729 Accurate. Phylogenetic trees were constructed using Neighbor-Joining method, Jukes Cantor  
730 protein distance measure, and 100 bootstrap replicates. For mutational frequency analysis, the total  
731 number of mutations at each residue of the Env sequence was determined. Numbering of each  
732 residue is consistent with the HXB2 strain sequence used as reference. For consensus logo  
733 construction, Env sequences of diverse subtypes were fetched from HIV sequence database,  
734 aligned using CLC Main Workbench. The logo was generated using an online tool, WebLogo  
735 (<https://weblogo.berkeley.edu/logo.cgi>).

#### 736 **Structural Modeling**

737 3D model of a gp140-T/F07 was generated using homology modeling server, SWISS-MODEL.  
738 BG505 gp140 (PDB ID: 4TVP) trimer was used as a template. Mutations were mapped on the  
739 modeled trimers using PyMol (ver. 1.74) molecular visualization software (51). Ab initio structural  
740 modeling of T/F07- and Y173-V1V2 domains was conducted using QUARK online tool.

741

742

## 743 **Molecular dynamics (MD) simulation**

744 First, T/F07-H173 and -Y173 trimer models were generated by MODELLER 9v7 using T/F100  
745 Env cryo-EM structure (PDB ID: 6NQD) as template for modeling. After predicting trimer  
746 structures, V1V2 domains were extracted and used for MD simulation. GROMACS 5.1.2 was used  
747 to run four MD simulations: H173/Strand, Y173/Strand, H173/Helix, and Y173/Helix as initial  
748 models. AMBER99SB-ILDN force field was employed for protein. Dodecahderon periodic box  
749 was solvated by TIP3P water molecules. The size of solvation box was set to 1.0 nm from the  
750 V1/V2 domain. Sodium ions were added to neutralize the system. After solvation, steepest decent  
751 minimization with 50000 steps was applied. Then, the systems were equilibrated at 300 K during  
752 100 ps (NVT equilibrium) and at 1.0 bar during 100 ps (NPT equilibrium). After equilibration,  
753 100 ns MD trajectory was produced for each system. The equilibration and MD production were  
754 done with 2 fs time step, applying LINCS algorithm.

## 755 **Plasmids construction**

756 gp16 V1V2 scaffolds and combinatorial libraries

757 The gp140-TF07 *env* sequence (spanning gp120 and the gp41 ectodomain up to amino acid 664)  
758 was codon optimized and synthesized using GeneArt Strings gene synthesis (Life Technologies).  
759 This synthetic fragment was used as template to amplify T/F07-V1V2 sequence corresponding to  
760 the residues 117-206 of the Env. The V1V2 sequence was cloned into pCDNA3.1(-) mammalian  
761 expression vector engineered to harbor codon optimized bacteriophage T4 terminase, gp16 with  
762 an N-terminal Gaussia luciferase (GLuc) signal peptide for secretion of recombinant protein into  
763 the media, and a Twin Strep-tag II sequence (WSHPQFEK) for affinity purification at the C-  
764 terminus. The amplified V1V2 fragment was cloned downstream to gp16 followed by Twin-strep

765 tags. After the construction gp16-T/F07 V1V2 clone, point mutation and/or deletion was  
766 introduced using site-directed mutagenesis to construct gp16-H173Y, - $\Delta$ DSV and -H173Y+ $\Delta$ DSV  
767 V1V2 scaffolds. For the construction gp16-V1V2 combinatorial libraries, these scaffolds were  
768 used as templates. Controlled mutagenesis was performed using randomized primer pool (IDT)  
769 with desired mutations or substitutions at the selected positions in the C-strand to generate V1V2  
770 mutant libraries. Amplified V1V2 library fragments were then cloned into the same pcDNA 3.1 (-  
771 ) vector used previously but with an exception that this vector was further engineered to harbor  
772 HRV3c protease cleavage site positioned before the Twin-strep tags for tag removal. For the  
773 construction of gp16-H173Y\_ $\Delta$ V1 combinatorial library, H173Y template with a stretch of V1  
774 loop residues (SNITVERNITIANDTYD) deleted and replaced by an optimized short-linker  
775 (AGGAS) was used.

776 gp140 and gp120 clones for heterologous antigen library

777 Codon-optimized gp140 *env* sequences (spanning gp120 and the gp41 ectodomain up to amino  
778 acid 664) for T/F07, T/F61, T/F94, T/F100, BG505, JRFL and SF162 harboring trimer stabilizing  
779 SOSIP mutations (52) and six arginine (R6) furin cleavage site (replacing native REKR cleavage  
780 site at the junction of gp120 and gp41) were synthesized (53). The gp140 genes were then cloned  
781 into pcDNA 3.1(-) vector that was engineered to harbor an N-terminal Cluster of Differentiation  
782 5 antigen (CD5) signal peptide for secretion of the recombinant proteins into the media and 8X-  
783 Histidine tag for affinity purification. Additional mutations/deletions were introduced in gp140-  
784 T/F07 using site directed mutagenesis kit (NEB). The clones' sequences were verified through  
785 sequencing (Retrogen, Inc.). The gp120 expression vectors were obtained from NIH AIDS  
786 Reagent Program (Table 1). The furin-expressing plasmid, Furin:FLAG/pGEM7Zf(+), was

787 obtained from Dr. Gary Thomas (Vollum Institute, Portland, Oregon). The furin fragment from  
788 this plasmid was subcloned into pcDNA3.1(-) (Life Technologies).

### 789 **Cells and Media**

790 HEK293S GnTI- (ATCC CRL-3022) suspension cells used for expression of HIV Env proteins  
791 were maintained in FreeStyle 293 expression medium (Life Technologies), supplemented with 1%  
792 heat-inactivated fetal bovine serum (FBS, Quality Biologicals). All cells were grown in suspension  
793 in a Multitron Pro orbital shaker (Infors HT) incubator at 37°C in 8% CO<sub>2</sub>, 80% humidified  
794 atmosphere.

### 795 **Transfection**

796 Plasmid DNAs for transfection were purified using Plasmid Midi kit (Qiagen) as per  
797 manufacturer's instructions. Transfections were carried out as described previously (54). Briefly,  
798 GnTi cells were grown to 1 x 10<sup>6</sup>/ml cell density for transfection. Prior to transfection, cells were  
799 centrifuged at 100 rpm for 5 minutes followed by full replacement of media with the fresh  
800 Freestyle293 media lacking FBS. The final cell density was adjusted to 2 x 10<sup>6</sup>/ml in half or 50%  
801 of the final volume of transfection. The cells were then placed in the shaker incubator for 1 hour  
802 at 37°C in 8% CO<sub>2</sub>, 80% humidified atmosphere. After incubation, DNA (1 µg/ml final  
803 transfection volume) was added followed by addition of linear polyethylenimine (PEI25k,  
804 Polyscience, Inc.) (1mg/ml) at a 3:1 ratio (PEI:DNA) to the cell suspension. For gp140 expression,  
805 cells were co-transfected with furin plasmid DNA to produce cleaved gp120 and gp41 subunits  
806 that then associate non-covalently to yield native Env proteins. After 12 h of transfection, HyClone  
807 SFM4HEK293 medium (GE Healthcare) supplemented with 1% FBS (v/v) and protein expression  
808 enhancing sodium butyrate (55) solution (SIGMA-ALDRICH) to a final concentration of 2 nM

809 were added to the cells to make up to the final volume of transfection. After 5 days of transfection,  
810 the supernatant was harvested by centrifuging the cells, and filtered using a 0.2 µm filter (Corning,  
811 Inc.).

## 812 **Protein purification**

813 Secreted twin strep-tagged gp16-V1V2 proteins in the harvested and filtered supernatant were  
814 supplemented with BioLock biotin blocking solution (IBA Lifesciences) at 5 µl/ml to mask the  
815 biotin present in the supernatant. After 30 min of incubation, the supernatant was loaded onto a 1  
816 ml StrepTactin column (Qiagen) at a flow rate of 0.7 ml/min in the ÄKTA prime-plus liquid  
817 chromatography system (GE Healthcare). Non-specifically bound proteins were washed off by  
818 passing at least 20 column volumes of the wash buffer (300 mM NaCl, 50 mM Tris-HCl, pH 8) or  
819 until the absorbance reached the baseline level. Bound gp16-V1V2 proteins were eluted with  
820 StrepTactin elution buffer (5 mM d-Desthiobiotin, 300 mM NaCl, 50 mM Tris-HCl, pH 8) at a  
821 flow rate of 1 ml/min. Eluted peak fractions were buffer exchanged into 100 mM NaCl, 50 mM  
822 Tris-HCl, pH 8 buffer. Protein fractions were stored with 10% glycerol at -80°C until use for  
823 antigenicity and immunogenicity studies. GnTi expressed His-tagged gp140s and gp120s were  
824 purified from the harvested and clarified supernatant using Ni-NTA agarose beads (Qiagen)  
825 following manufacturer's instructions.

## 826 **Strep-tag removal from gp16-V1V2 immunogens**

827 For the second mice immunization study, the Twin-strep tags were cleaved off the immunogens  
828 using HRV3c protease. The recombinant proteins eluted after StrepTactin affinity  
829 chromatography, were buffer exchanged with 1X HRV3C protease buffer to remove the  
830 desthiobiotin present in the elution buffer. 1 µL of protease was added per 20 µg of the purified



831 protein (1:20) and incubated at 4°C for 16 hours. Digested protein was passed twice through  
832 StrepTactin spin column (IBA). Uncleaved strep-tagged protein bound to the column while the  
833 flow-through containing desirable cleaved fraction was collected. The cleaved protein was then  
834 loaded onto the size-exclusion chromatography column for fractionation using 100 mM NaCl, 50  
835 mM Tris-HCl, pH 8 buffer. Owing to a large difference in the native dodecameric gp16-V1V2  
836 (~336 kD), HRV3C protease (47.8 kD) was separated from the final immunogens. The gp16-V1V2  
837 fractions were pooled, concentrated and stored at -80°C until use.

### 838 **Biochemical analyses and quantitation of proteins**

839 Purified proteins were run on SDS-PAGE to quantify and assess for non-specific protein  
840 contamination. SDS-PAGE analyses were performed using 4-20% gradient Tris-glycine gels (Life  
841 Technologies) or home-made 12% gels in the presence of DTT (reducing conditions) or absence  
842 of DTT (non-reducing). All gels were stained with Coomassie blue R-250 solution. Band  
843 intensities were measured using Bio-Rad Gel Doc XR+ System and Image Lab software. BSA  
844 standards were used to generate a standard curve for quantification. Deglycosylation was also  
845 performed to sharpen the bands for accurate quantitation as HIV Env proteins are glycosylated and  
846 hence appear fuzzy on gels. For deglycosylation, 1 µl (500 Units) of PNGase F (New England  
847 BioLabs, Inc.) was used to deglycosylate 10 µg of the protein in the presence of 5 mM DTT and  
848 mild detergents by incubating at room temperature for 1 hour according to manufacturer's  
849 recommendations.

### 850 **Western Blotting**

851 Proteins separated by SDS-PAGE were transferred to a PVDF membrane using the Trans-Blot®  
852 Turbo RTA Mini PVDF Transfer Kit (Bio-Rad Laboratories, Inc.). Membranes after activating

853 with methanol were blocked with bovine serum albumin (Amresco, LLC). For Strep-Tag II  
854 detection, HRP-conjugated StrepMAB-Classical MAb was used at 1:3000 dilution in PBS.  
855 Purified mAbs, CH58 and CH59 were used as primary antibodies at 1:5000 dilution in PBS and  
856 rabbit anti-human Ab HRP conjugate (Santa Cruz Biotechnology) was used as secondary  
857 antibodies at 1:10,000 dilution in PBS. Signal from HRP-conjugated antibodies was detected using  
858 Clarity™ Western ECL Blotting substrate (Bio-Rad Laboratories, Inc.). Band intensities were  
859 measured using Bio-Rad Gel Doc XR+ System and Image Lab software.

## 860 **Enzyme Linked Immunosorbent Assay (ELISA)**

### 861 StrepTactin ELISA

862 StrepTactin ELISA was performed to determine CH58 and CH59 binding to gp16-V1V2 proteins.  
863 These specialized plates are pre-coated with StrepTactin to capture strep-tagged antigens. Since  
864 the antigen does not directly bind to the plate surface it is maintained in native conformation that  
865 improves antibody recognition. To perform this assay, StrepTactin coated microplates (IBA Life  
866 Sciences) were coated with 1 µg/ml Strep-tagged proteins in a volume of 100 µl per well of buffer  
867 (25 mM Tris-HCl, pH 7.6, 2 mM EDTA, and 140 mM NaCl) and incubated for 2 h at 4°C.  
868 Following three washes with PBST (0.05% Tween-20 in 1X PBS), 100 µl of serially diluted Abs  
869 (10-0.001 µg/ml) in PBS were added to the wells and the plates were incubated for 1 h at 37°C.  
870 After three washes with PBST, the plates were incubated with 100 µl of rabbit anti-human Ab  
871 HRP conjugate at 1:3,000 dilution in PBS for 30 min at 37°C. The plates were then washed three  
872 times with PBST and the peroxidase substrate was added to develop the color reaction (TMB  
873 Microwell Peroxidase Substrate system, KPL). The reaction was terminated by adding 100 µl of  
874 BlueSTOP solution (KPL) and OD650 was recorded using VersaMax ELISA Microplate Reader  
875 (Molecular Devices).

876 Conventional ELISA

877 96-well Nunc ELISA plates were coated with 100 ng/well antigen diluted in 1X PBS to a  
878 concentration of 1µg/ml, for overnight at 4°C. After 12 hours, the plates were washed thrice with  
879 1X PBST (1X PBS + 0.05% Tween), followed by blocking with 5% BSA in 1X PBS for 1h at  
880 room temperature (RT). After incubation, plates were washed thrice with 1X PBST, followed by  
881 addition of 100 µL of primary antibody or serum dilution for 1h at 37°C. After incubation, the  
882 plates are washed three times same as before and anti-mouse secondary antibody was added,  
883 followed by 30 mins incubation at RT. The remaining procedure is same as described above for  
884 Strep-Tactin ELISA.

885 **Antibody blocking assay**

886 Antibody blocking assay was conducted by modifying the ELISA protocol. Briefly, 96-well Nunc  
887 ELISA plates were coated with 100 ng/well gp140-T/F07 antigen diluted in 1X PBS to a  
888 concentration of 1µg/ml, for overnight at 4°C. After 12 hours, the plates were washed thrice with  
889 1X PBST, followed by blocking with 3% BSA in 1X PBS for 1h at room temperature (RT). Plates  
890 were washed thrice with 1X PBST, followed by addition of 100 µL of CH58 or CH59 antibody  
891 dilution (1µg/ml) for 1h at 37°C. Wells not preincubated with CH58/CH59 antibodies served as  
892 unblocked positive control. The antibodies blocked and unblocked (control) plates were washed  
893 three times same as before and incubated with optimized mice sera dilutions (1:2000) from various  
894 immunization groups for another 1h at 37°C. After washing three times, the plates were incubated  
895 with anti-mouse HRP conjugated secondary antibody for 30 mins at RT. The plates were then  
896 washed followed by TMB peroxidase substrate addition (KPL) and read as described above for  
897 ELISA.

## 898 **Surface Plasmon Resonance (SPR) Binding Assay**

899 Longitudinal plasma samples of RV217 participant-40007 were analyzed by SPR for the presence  
900 of V2-specific Abs. SPR measurements were made with a Biacore 4000 system (GE Healthcare,  
901 Uppsala, Sweden). The assay was conducted as described previously (11). Briefly, plasma samples  
902 were heat-inactivated at 56°C for 45 mins followed by centrifugation at  $16,000 \times g$  at 4 °C for 20  
903 min and the supernatants were used for SPR analyses. Recombinant gp16-T/F07 and other escape  
904 mutant proteins were immobilized onto CM5 or CM7 series sensor chips. Plasma samples diluted  
905 1:100 in running buffer (10 mM HEPES, 300mM NaCl and 0.005% Tween 20, pH 7.4) were  
906 injected onto the immobilized chip. The detection of antigen-antibody complexes captured on the  
907 chip surface was then enhanced with a 200 s injection of 30 µg/mL secondary sheep anti-human  
908 IgG antibody (Binding Site, Birmingham, United Kingdom). For evaluating the binding of Abs  
909 present in immunized mice sera with V2-peptides, the sensor chips were first prepared using a  
910 standard amine-coupling method as previously described (11) for coupling of streptavidin. Then,  
911 N-linked biotinylated overlapping V2-peptides synthesized by JPT Peptide Technologies GmbH  
912 (Berlin, Germany) were captured onto the streptavidin immobilized chips. Sample or buffer was  
913 injected at a flow rate of 10 µL/min at 25 °C. The data analysis was performed using Biacore 4000  
914 Evaluation Software v4.1 (GE Healthcare, Uppsala Sweden). The reported RU for the IgG specific  
915 values are represented as a difference between the average value of a 5 s window taken 60 s after  
916 the end of the anti-IgG injection and the average value of a 5 s window taken 10 s before the  
917 beginning of the anti-IgG injection. The response units were double subtracted by the RU of the  
918 unmodified surface and buffer.

919

920

## 921 **GranToxiLux (GTL) Antibody dependent cell cytotoxicity (ADCC) assay**

922 ADCC assays were performed as described previously (56). Human CD4<sup>+</sup> T lymphoblasts,  
923 CEM.NKR, were used as target cells to coat recombinant gp120 proteins. The amount of coating  
924 gp120 was optimized through competition by binding of the Leu3A (anti-CD4) antibody (clone  
925 SK3; Catalog no. 340133; Final dilution 1:5; BD Bioscience, San Jose, CA, USA). Cryopreserved  
926 peripheral blood mononuclear cells, PBMCs from a healthy donor, thawed and rested overnight in  
927 R10 media, were used as effector cells (source of effector NK cells). The following day, target  
928 cells were coated with titrated amount of T/F07 and its V1V2-mutant gp120s for 75 minutes at  
929 37°C. After incubation, coated target cells were mixed with effector cells in 30:1 ratio in 96-well  
930 V-bottom plate, followed by addition on granzymeB (GzB). Finally, 4-folds serially dilutions of  
931 heat-inactivated plasma samples of RV217 participant- 40007, from three visits, v0 (pre-infection)  
932 for the baseline, and 4-wks (v9) and 24-wks (v14) post-infection or purified antibodies, CH58 and  
933 CH65 were added to the respective wells. After 1 hour incubation at 37°C and 5% CO<sub>2</sub>, the plate  
934 was centrifuged and washed with wash buffer. After washing, the cells were resuspended in wash  
935 buffer and the plate was read using the BD LSRII or BD LSRFortessa with the High Throughput  
936 Sampler (HTS) with a minimum of 1250 events, to detect the activity of granzyme B (GzB)  
937 released by the effector population into target cells. The viable target cells with activated GzB  
938 substrate represented the actual population recognized by the effector cells and reported as %GzB  
939 activity. The results are reported after background subtraction of the signal acquired from target  
940 cells incubated with effector cells in the absence of plasma/antibodies.

## 941 **Mice immunization**

942 6-wks old female BALB/c mice were received from Jackson's laboratory for immunization  
943 experiments. The immunization was initiated after 2 wks of quarantine. The weights of the mice

944 were taken periodically from the start of the quarantine period to assess growth and health of mice  
945 throughout the experiment. 20 µg of the antigen complexed with Alhydrogel 2% (Invivogen) as  
946 adjuvant was injected intramuscularly per mouse using a 22-23 gauge needle syringe. Three  
947 boosters were given after prime/first immunization at an interval of 3 wks and tail bleed was  
948 performed to collect sera before each immunization. Mice were also bled before the first  
949 immunization to collect pre-immunized (pre-bleed) sera for the negative control. Terminal bleed  
950 was performed through cardiac puncture under general anesthesia followed by cervical dislocation  
951 to euthanize the animals.

952

953

## 954 **Funding**

955 This work was supported by the National Institute of Allergy and Infectious Diseases NIH grants  
956 AI111538, AI102725, and AI081726 to V.B.R. and by a cooperative agreement (W81XWH-07-  
957 2-0067 and W81XWH-11-0174) between the Henry M. Jackson Foundation for the Advancement  
958 of Military Medicine, Inc. and the U.S. Department of Defense. DK acknowledges supports by the  
959 National Institutes of Health (R01GM133840 and R01GM123055) and the National Science  
960 Foundation (CMMI1825941, MCB1925643, and DBI2003635).

961

962

963

964

## 965 **References**

- 966 1. Mocroft A, Phillips AN, Gatell J, Ledergerber B, Fisher M, Clumeck N, et al. Normalisation of CD4  
967 counts in patients with HIV-1 infection and maximum virological suppression who are taking combination  
968 antiretroviral therapy: an observational cohort study. *Lancet*. 2007;370(9585):407-13.
- 969 2. WHO. HIV treatment and care.
- 970 3. UNAIDS. Global HIV & AIDS statistics — 2019 fact sheet 2019 [Available from:  
971 <https://www.unaids.org/en/resources/fact-sheet>.
- 972 4. Esparza J. A brief history of the global effort to develop a preventive HIV vaccine. *Vaccine*.  
973 2013;31(35):3502-18.
- 974 5. Esparza J. What Has 30 Years of HIV Vaccine Research Taught Us? *Vaccines (Basel)*. 2013;1(4):513-  
975 26.
- 976 6. Miedema F. A brief history of HIV vaccine research: stepping back to the drawing board? *AIDS*.  
977 2008;22(14):1699-703.
- 978 7. Gilbert PB, Berger JO, Stablein D, Becker S, Essex M, Hammer SM, et al. Statistical interpretation  
979 of the RV144 HIV vaccine efficacy trial in Thailand: a case study for statistical issues in efficacy trials. *The*  
980 *Journal of infectious diseases*. 2011;203(7):969-75.
- 981 8. Rerks-Ngarm S, Pitisuttithum P, Nitayaphan S, Kaewkungwal J, Chiu J, Paris R, et al. Vaccination  
982 with ALVAC and AIDSVAX to prevent HIV-1 infection in Thailand. *N Engl J Med*. 2009;361(23):2209-20.
- 983 9. de Souza MS, Ratto-Kim S, Chuenarom W, Schuetz A, Chantakulkij S, Nuntapinit B, et al. The Thai  
984 phase III trial (RV144) vaccine regimen induces T cell responses that preferentially target epitopes within  
985 the V2 region of HIV-1 envelope. *J Immunol*. 2012;188(10):5166-76.
- 986 10. Haynes BF, Gilbert PB, McElrath MJ, Zolla-Pazner S, Tomaras GD, Alam SM, et al. Immune-  
987 correlates analysis of an HIV-1 vaccine efficacy trial. *N Engl J Med*. 2012;366(14):1275-86.
- 988 11. Trinh HV, Gohain N, Pham PT, Hamlin C, Song H, Sanders-Buell E, et al. Correction: Trinh, H.V., et  
989 al. Humoral Response to the HIV-1 Envelope V2 Region in a Thai Early Acute Infection Cohort. *Cells* 2019,  
990 8, 365. *Cells*. 2019;8(6).
- 991 12. Rolland M, Edlefsen PT, Larsen BB, Tovanabutra S, Sanders-Buell E, Hertz T, et al. Increased HIV-1  
992 vaccine efficacy against viruses with genetic signatures in Env V2. *Nature*. 2012;490(7420):417-20.
- 993 13. Land A, Braakman I. Folding of the human immunodeficiency virus type 1 envelope glycoprotein  
994 in the endoplasmic reticulum. *Biochimie*. 2001;83(8):783-90.
- 995 14. Leonard CK, Spellman MW, Riddle L, Harris RJ, Thomas JN, Gregory TJ. Assignment of intrachain  
996 disulfide bonds and characterization of potential glycosylation sites of the type 1 recombinant human  
997 immunodeficiency virus envelope glycoprotein (gp120) expressed in Chinese hamster ovary cells. *J Biol*  
998 *Chem*. 1990;265(18):10373-82.
- 999 15. Pan R, Gorny MK, Zolla-Pazner S, Kong X-P. The V1V2 Region of HIV-1 gp120 Forms a Five-Stranded  
1000 Beta Barrel. *Journal of Virology*. 2015;89(15):8003.
- 1001 16. Hioe CE, Kumar R, Upadhyay C, Jan M, Fox A, Itri V, et al. Modulation of Antibody Responses to  
1002 the V1V2 and V3 Regions of HIV-1 Envelope by Immune Complex Vaccines. *Front Immunol*. 2018;9:2441.
- 1003 17. Rao M, Peachman KK, Kim J, Gao G, Alving CR, Michael NL, et al. HIV-1 variable loop 2 and its  
1004 importance in HIV-1 infection and vaccine development. *Curr HIV Res*. 2013;11(5):427-38.
- 1005 18. Sagar M, Wu X, Lee S, Overbaugh J. Human immunodeficiency virus type 1 V1-V2 envelope loop  
1006 sequences expand and add glycosylation sites over the course of infection, and these modifications affect  
1007 antibody neutralization sensitivity. *J Virol*. 2006;80(19):9586-98.
- 1008 19. Kwong PD, Wyatt R, Robinson J, Sweet RW, Sodroski J, Hendrickson WA. Structure of an HIV gp120  
1009 envelope glycoprotein in complex with the CD4 receptor and a neutralizing human antibody. *Nature*.  
1010 1998;393(6686):648-59.

- 1011 20. Pancera M, Zhou T, Druz A, Georgiev IS, Soto C, Gorman J, et al. Structure and immune recognition  
1012 of trimeric pre-fusion HIV-1 Env. *Nature*. 2014;514(7523):455-61.
- 1013 21. Klasse PJ. The molecular basis of HIV entry. *Cellular Microbiology*. 2012;14(8):1183-92.
- 1014 22. Wilen CB, Tilton JC, Doms RW. Molecular mechanisms of HIV entry. *Adv Exp Med Biol*.  
1015 2012;726:223-42.
- 1016 23. Arthos J, Cicala C, Martinelli E, Macleod K, Van Ryk D, Wei D, et al. HIV-1 envelope protein binds  
1017 to and signals through integrin alpha4beta7, the gut mucosal homing receptor for peripheral T cells. *Nat*  
1018 *Immunol*. 2008;9(3):301-9.
- 1019 24. Arthos J, Cicala C, Nawaz F, Byrareddy SN, Villinger F, Santangelo PJ, et al. The Role of Integrin  
1020 alpha4beta7 in HIV Pathogenesis and Treatment. *Curr HIV/AIDS Rep*. 2018;15(2):127-35.
- 1021 25. Goes LR, Sajani A, Sivro A, Olowojesiku R, Ray JC, Perrone I, et al. The V2 loop of HIV gp120 delivers  
1022 costimulatory signals to CD4(+) T cells through Integrin alpha4beta7 and promotes cellular activation and  
1023 infection. *Proc Natl Acad Sci U S A*. 2020;117(51):32566-73.
- 1024 26. Peachman KK, Karasavvas N, Chenine AL, McLinden R, Rerks-Ngarm S, Jaranit K, et al.  
1025 Identification of New Regions in HIV-1 gp120 Variable 2 and 3 Loops that Bind to alpha4beta7 Integrin  
1026 Receptor. *PLoS One*. 2015;10(12):e0143895.
- 1027 27. Lertjuthaporn S, Cicala C, Van Ryk D, Liu M, Yolitz J, Wei D, et al. Select gp120 V2 domain specific  
1028 antibodies derived from HIV and SIV infection and vaccination inhibit gp120 binding to alpha4beta7. *PLoS*  
1029 *Pathog*. 2018;14(8):e1007278.
- 1030 28. van Eeden C, Wibmer CK, Scheepers C, Richardson SI, Nonyane M, Lambson B, et al. V2-Directed  
1031 Vaccine-like Antibodies from HIV-1 Infection Identify an Additional K169-Binding Light Chain Motif with  
1032 Broad ADCC Activity. *Cell Reports*. 2018;25(11):3123-35.e6.
- 1033 29. Sun S, Gao S, Kondabagil K, Xiang Y, Rossmann MG, Rao VB. Structure and function of the small  
1034 terminase component of the DNA packaging machine in T4-like bacteriophages. *Proc Natl Acad Sci U S A*.  
1035 2012;109(3):817-22.
- 1036 30. Ananthaswamy N, Fang Q, AlSalmi W, Jain S, Chen Z, Klose T, et al. A sequestered fusion peptide  
1037 in the structure of an HIV-1 transmitted founder envelope trimer. *Nat Commun*. 2019;10(1):873.
- 1038 31. Mayr LM, Decoville T, Schmidt S, Laumond G, Klingler J, Ducloy C, et al. Non-neutralizing  
1039 Antibodies Targeting the V1V2 Domain of HIV Exhibit Strong Antibody-Dependent Cell-mediated Cytotoxic  
1040 Activity. *Scientific reports*. 2017;7(1):12655-.
- 1041 32. Bonsignori M, Pollara J, Moody MA, Alpert MD, Chen X, Hwang KK, et al. Antibody-dependent  
1042 cellular cytotoxicity-mediating antibodies from an HIV-1 vaccine efficacy trial target multiple epitopes and  
1043 preferentially use the VH1 gene family. *J Virol*. 2012;86(21):11521-32.
- 1044 33. Bradley T, Pollara J, Santra S, Vandergrift N, Pittala S, Bailey-Kellogg C, et al. Pentavalent HIV-1  
1045 vaccine protects against simian-human immunodeficiency virus challenge. *Nature Communications*.  
1046 2017;8(1):15711.
- 1047 34. Wibmer CK, Richardson SI, Yolitz J, Cicala C, Arthos J, Moore PL, et al. Common helical V1V2  
1048 conformations of HIV-1 Envelope expose the alpha4beta7 binding site on intact virions. *Nat Commun*.  
1049 2018;9(1):4489.
- 1050 35. Liao HX, Bonsignori M, Alam SM, McLellan JS, Tomaras GD, Moody MA, et al. Vaccine induction of  
1051 antibodies against a structurally heterogeneous site of immune pressure within HIV-1 envelope protein  
1052 variable regions 1 and 2. *Immunity*. 2013;38(1):176-86.
- 1053 36. Hessel AJ, Powell R, Jiang X, Luo C, Weiss S, Dussupt V, et al. Multimeric Epitope-Scaffold HIV  
1054 Vaccines Target V1V2 and Differentially Tune Polyfunctional Antibody Responses. *Cell Rep*.  
1055 2019;28(4):877-95 e6.
- 1056 37. Sali A, Blundell TL. Comparative protein modelling by satisfaction of spatial restraints. *J Mol Biol*.  
1057 1993;234(3):779-815.



- 1058 38. Van Der Spoel D, Lindahl E, Hess B, Groenhof G, Mark AE, Berendsen HJ. GROMACS: fast, flexible,  
1059 and free. *Journal of computational chemistry*. 2005;26(16):1701-18.
- 1060 39. Xu D, Zhang Y. Ab initio protein structure assembly using continuous structure fragments and  
1061 optimized knowledge-based force field. *Proteins*. 2012;80(7):1715-35.
- 1062 40. Saunders CJ, McCaffrey RA, Zharkikh I, Kraft Z, Malenbaum SE, Burke B, et al. The V1, V2, and V3  
1063 regions of the human immunodeficiency virus type 1 envelope differentially affect the viral phenotype in  
1064 an isolate-dependent manner. *J Virol*. 2005;79(14):9069-80.
- 1065 41. Sanders RW, Schiffner L, Master A, Kajumo F, Guo Y, Dragic T, et al. Variable-loop-deleted variants  
1066 of the human immunodeficiency virus type 1 envelope glycoprotein can be stabilized by an intermolecular  
1067 disulfide bond between the gp120 and gp41 subunits. *J Virol*. 2000;74(11):5091-100.
- 1068 42. Silva de Castro I, Gorini G, Mason R, Gorman J, Bissa M, Rahman MA, et al. Anti-V2 antibodies  
1069 virus vulnerability revealed by envelope V1 deletion in HIV vaccine candidates. *iScience*.  
1070 2021;24(2):102047.
- 1071 43. Kim JH, Excler JL, Michael NL. Lessons from the RV144 Thai phase III HIV-1 vaccine trial and the  
1072 search for correlates of protection. *Annu Rev Med*. 2015;66:423-37.
- 1073 44. Excler J-L, Ake J, Robb ML, Kim JH, Plotkin SA. Nonneutralizing functional antibodies: a new "old"  
1074 paradigm for HIV vaccines. *Clin Vaccine Immunol*. 2014;21(8):1023-36.
- 1075 45. Bruel T, Guivel-Benhassine F, Lorin V, Lortat-Jacob H, Baleux F, Bourdic K, et al. Lack of ADCC  
1076 Breadth of Human Nonneutralizing Anti-HIV-1 Antibodies. *J Virol*. 2017;91(8).
- 1077 46. Dupuy FP, Kant S, Barbe A, Routy JP, Bruneau J, Lebouche B, et al. Antibody-Dependent Cellular  
1078 Cytotoxicity-Competent Antibodies against HIV-1-Infected Cells in Plasma from HIV-Infected Subjects.  
1079 *mBio*. 2019;10(6).
- 1080 47. Mabuka J, Nduati R, Odem-Davis K, Peterson D, Overbaugh J. HIV-specific antibodies capable of  
1081 ADCC are common in breastmilk and are associated with reduced risk of transmission in women with high  
1082 viral loads. *PLoS Pathog*. 2012;8(6):e1002739.
- 1083 48. Isitman G, Lisovsky I, Tremblay-McLean A, Kovacs C, Harris M, Routy JP, et al. Antibody-Dependent  
1084 Cellular Cytotoxicity Activity of Effector Cells from HIV-Infected Elite and Viral Controllers. *AIDS Res Hum*  
1085 *Retroviruses*. 2016;32(10-11):1079-88.
- 1086 49. Robb ML, Eller LA, Kibuuka H, Rono K, Maganga L, Nitayaphan S, et al. Prospective Study of Acute  
1087 HIV-1 Infection in Adults in East Africa and Thailand. *New England Journal of Medicine*. 2016.
- 1088 50. Keele BF, Giorgi EE, Salazar-Gonzalez JF, Decker JM, Pham KT, Salazar MG, et al. Identification and  
1089 characterization of transmitted and early founder virus envelopes in primary HIV-1 infection. *Proc Natl*  
1090 *Acad Sci U S A*. 2008;105(21):7552-7.
- 1091 51. Schrödinger LLC. The PyMOL Molecular Graphics System, Version 1.74. 2010.
- 1092 52. Sanders RW, Derking R, Cupo A, Julien J-P, Yasmeen A, de Val N, et al. A next-generation cleaved,  
1093 soluble HIV-1 Env trimer, BG505 SOSIP.664 gp140, expresses multiple epitopes for broadly neutralizing  
1094 but not non-neutralizing antibodies. *PLoS pathogens*. 2013;9(9):e1003618-e.
- 1095 53. Binley JM, Sanders RW, Master A, Cayanan CS, Wiley CL, Schiffner L, et al. Enhancing the  
1096 proteolytic maturation of human immunodeficiency virus type 1 envelope glycoproteins. *J Virol*.  
1097 2002;76(6):2606-16.
- 1098 54. AlSalmi W, Mahalingam M, Ananthaswamy N, Hamlin C, Flores D, Gao G, et al. A New Approach  
1099 to Produce HIV-1 Envelope Trimers: BOTH CLEAVAGE AND PROPER GLYCOSYLATION ARE ESSENTIAL TO  
1100 GENERATE AUTHENTIC TRIMERS. *J Biol Chem*. 2015;290(32):19780-95.
- 1101 55. Reeves PJ, Kim JM, Khorana HG. Structure and function in rhodopsin: a tetracycline-inducible  
1102 system in stable mammalian cell lines for high-level expression of opsin mutants. *Proc Natl Acad Sci U S*  
1103 *A*. 2002;99(21):13413-8.
- 1104 56. Pollara J, Hart L, Brewer F, Pickeral J, Packard BZ, Hoxie JA, et al. High-throughput quantitative  
1105 analysis of HIV-1 and SIV-specific ADCC-mediating antibody responses. *Cytometry A*. 2011;79(8):603-12.

1106  
1107  
1108  
1109

### Supplementary information

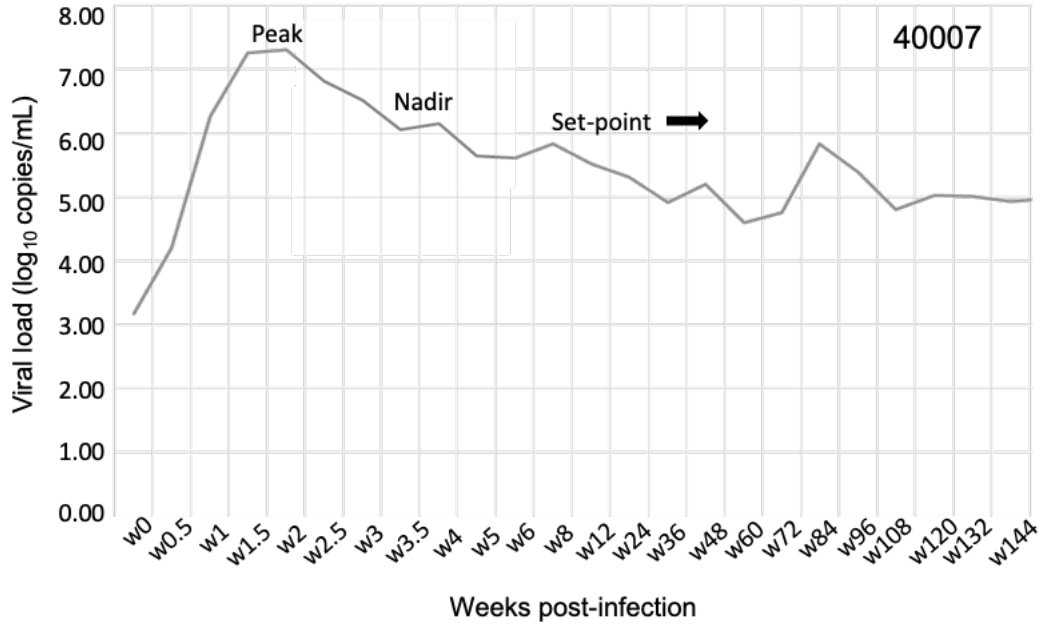

1110  
1111  
1112  
1113  
1114  
1115  
1116  
1117  
1118

**Fig S1. Longitudinal viral load analysis over a course of infection in 40007 participant.** Viral load values (log<sub>10</sub>) are plotted on y-axis, against the number of weeks since the first HIV-positive reaction with nucleic acid test on the x-axis. A typical pattern of curve with a peak, nadir and set point in viral load was observed in this patient representing early captured infection. The set point is the viral load of a person infected with HIV, which stabilizes after a period of acute HIV infection.

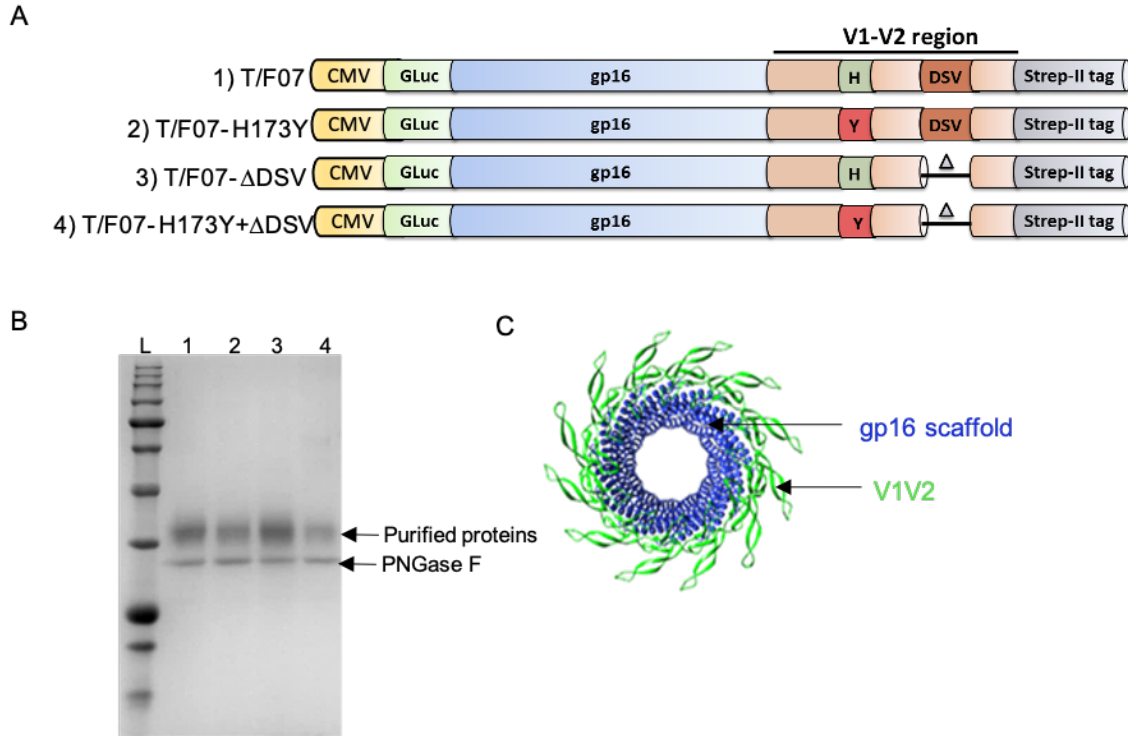

1119

1120

1121 **Fig S2. gp16-V1V2 construct design and purification** (A) gp16-V1V2 constructs corresponding to the T/F07 virus  
1122 sequence and V1V2-specific mutations accumulated until 24-weeks of infection in participant 40007. The V1V2  
1123 sequence (light orange) amplified from the T/F07 Env (gp160) sequence was fused in frame to the C-terminus of gp16  
1124 scaffold (blue). Each construct was cloned under CMV promoter and contained an N-terminal signal peptide (GLuc)  
1125 for secretion of these recombinant proteins into the medium, and a C-terminal Twin Strep-tag II (gray) for affinity  
1126 purification. 24-week V2-mutations were introduced in the C  $\beta$ -strand (H173Y, red) and the hypervariable V2 loop (3  
1127 residue deletion- $\Delta$ DSV) indicated by a small triangle in the parental T/F07 construct to generate single and double  
1128 mutants. (B) SDS-PAGE gel profile of gp16-V1V2 variant scaffolds of T/F07 expressed in HEK293S (GnTi) cells  
1129 and purified through StrepTactin-based affinity chromatography. These recombinant glycoproteins were  
1130 deglycosylated by PNGase F (band labeled on the gel) to obtain sharper bands on the gel for the purpose of  
1131 quantification. (C) Dodecameric model of gp16-V1V2 showing gp16-scaffold in blue and fused V1V2 domain in  
1132 bright green.

1133

1134

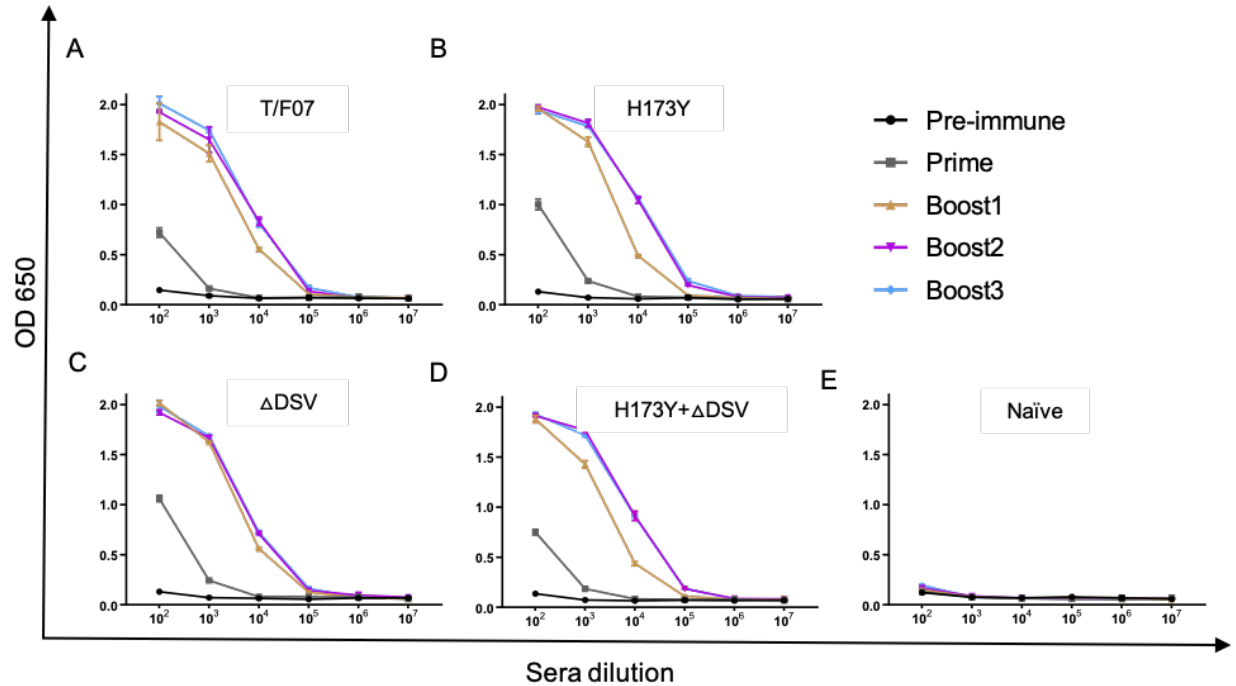

1135

1136 **Fig S3. V1V2-specific antibody titers.** (A-E) Comparative titers of V1V2-antibodies ranging from first (prime) to  
1137 the last immunization (Boost 3) in mice groups immunized with gp16- T/F07 (A) H173Y (B) ΔDSV (C)  
1138 H173Y+ΔDSV (D), and Naïve group (no antigen control) (E) are shown. Respective pre-immune sera (collected  
1139 before first immunization) from each group were also kept as negative control. The antibody titers are determined  
1140 through ELISA. Respective purified recombinant soluble gp140-T/F07, -H173Y, -ΔDSV and -H173Y+ΔDSV Env  
1141 glycoproteins were used as coating antigens (1μg/ml) matching the V1V2 region. Triplicate absorbance (OD 650 nm)  
1142 readings are used to generate binding curves for each sample. A color-coded key is provided on the top-right corner  
1143 for each immunization specific curve.

1144

1145

1146

1147

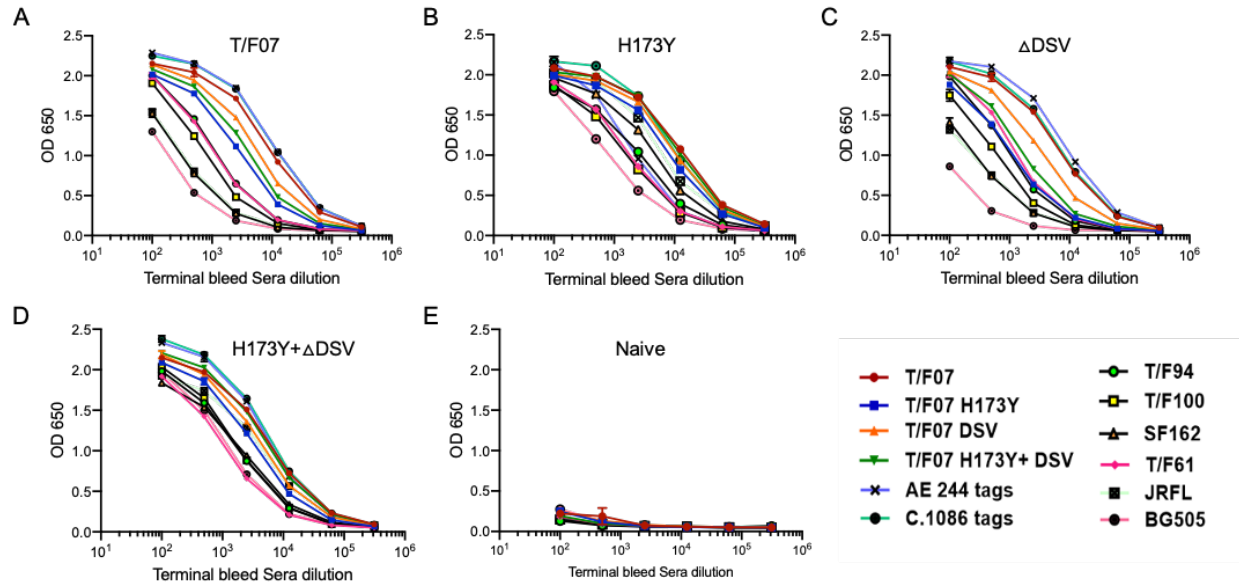

1148

1149

1150 **Fig S4.** (A-E) Breadth was evaluated by assessing binding with a set of purified autologous and heterologous Env  
1151 proteins (soluble gp140s and V1V2 tags). Respective antigen binding curves are plotted against the serial dilutions of  
1152 the terminal bleed sera from each group immunized with T/F07 (A), H173Y (B),  $\Delta$ DSV (C), H173Y+ $\Delta$ DSV (D), and  
1153 PBS (Naïve, negative control) (E). Binding curves are color-coded with respect to antigen coated as shown in the  
1154 legend at the bottom of the graph. The binding was determined through ELISA and triplicate absorbance (OD 650  
1155 nm) readings were used to generate binding curves.

1156

1157

1158

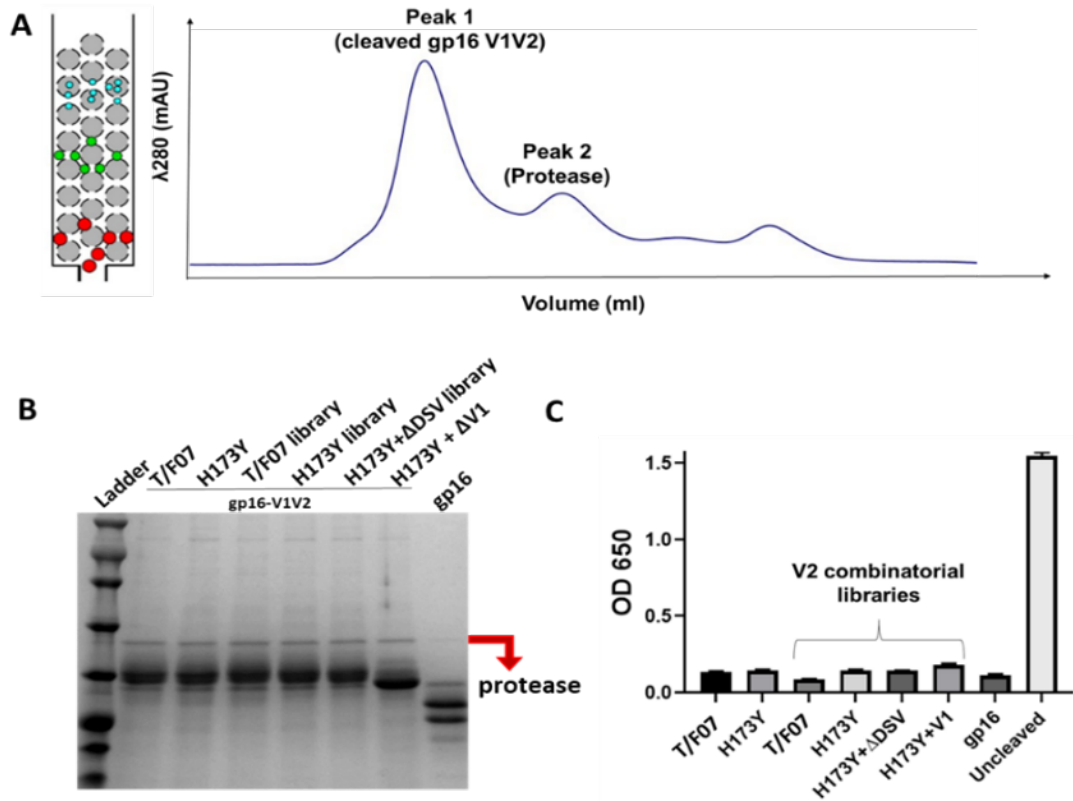

1159

1160

1161

1162 **Fig S5. Purification of Twin-strep-tag cleaved V1V2 immunogens.** (A) Size exclusion chromatography (SEC)  
1163 fractionation profile of cleaved gp16-V1V2 proteins (peak 1) depicting separation of HRV3C protease (peak 2).  
1164 Elution volume is plotted on the x-axis while the y-axis shows UV absorbance of the fractions. (B) Reducing SDS-  
1165 PAGE profile of purified and concentrated gp16-V1V2 immunogens. Presence of very small fraction of the protease  
1166 (marked by a red arrow) was detected. Appearance of smeary pattern or doublet bands are due to the presence of  
1167 glycoforms. (C) ELISA based detection of  $\alpha$ -strep tag response in the final preparation of twin-strep tag cleaved  
1168 immunogens for quality control. Negligible amount of  $\alpha$ -strep tag response was observed for all the immunogens.  
1169 Uncleaved (with twin-strep tag) gp16-V1V2 was used a positive control.

1170

1171

1172

1173

1174

1175

1176

1177

1178

1179

**Table 1. List of reagents ordered from NIH Reagent Program**

| Catalog # | Description                                             |
|-----------|---------------------------------------------------------|
| 4961      | HIV-1 BaL gp120 Recombinant Protein                     |
| 7749      | HIV-1 CN54 gp120 Recombinant Protein                    |
| 10080     | HIV-1 96ZM651 gp120 Recombinant Protein                 |
| 11556     | HIV-1 JR-CSF Fc-gp120 Recombinant Protein               |
| 11784     | HIV-1 IIIB gp120 Recombinant Protein                    |
| 12063     | HIV-1 UG037 gp140 Recombinant Protein                   |
| 12064     | HIV-1 CN54 gp140 Recombinant Protein                    |
| 12569     | HIV-1 gp120 Recombinant Protein (AE.A244 D11gp120)      |
| 12570     | HIV-1 gp120 Recombinant Protein (B.MN D11gp120)         |
| 12571     | HIV-1 gp120 Recombinant Protein (B.9021 D11gp120)       |
| 12572     | HIV-1 gp140 Recombinant Protein (B.6240 gp140C)         |
| 12574     | HIV-1 gp120 Recombinant Protein (B.63521 D11gp120 mutC) |
| 12576     | HIV-1 gp120 Recombinant Protein (M.CON-S D11gp120)      |
| 12581     | HIV-1 gp140 Recombinant Protein (C.1086 gp140C)         |
| 13055     | HIV-1 AC10.29 gp120 Avi His Recombinant Protein         |
| 13342     | HIV-1 93TH975 gp120 Recombinant Protein                 |
| 12567     | HIV-1 Env V1V2 Recombinant Protein (AE.A244 V1V2.tags)  |
| 12568     | HIV-1 Env V1V2 Recombinant Protein (C.1086 V1V2.tags)   |
| 8660      | HIV-1 96ZM651.8 gp140 Optimized Expression Vector       |
| 12806     | HIV-1 CM235 gp120 Expression Vector (pCl.CM235.gp120)   |
| 12957     | HIV-1 AC10.29 gp120 Avi His Optimized Expression Vector |
| 13348     | HIV-1 BaL gp120 His Expression Vector                   |
| 13349     | HIV-1 93TH975 gp120 His Expression Vector               |
| 13350     | HIV-1 CN54 gp120 His Expression Vector                  |
| 12551     | CH59 mAb                                                |
| 12550     | CH58 mAb                                                |

1180

1181

1182

1183

1184

1185

1186

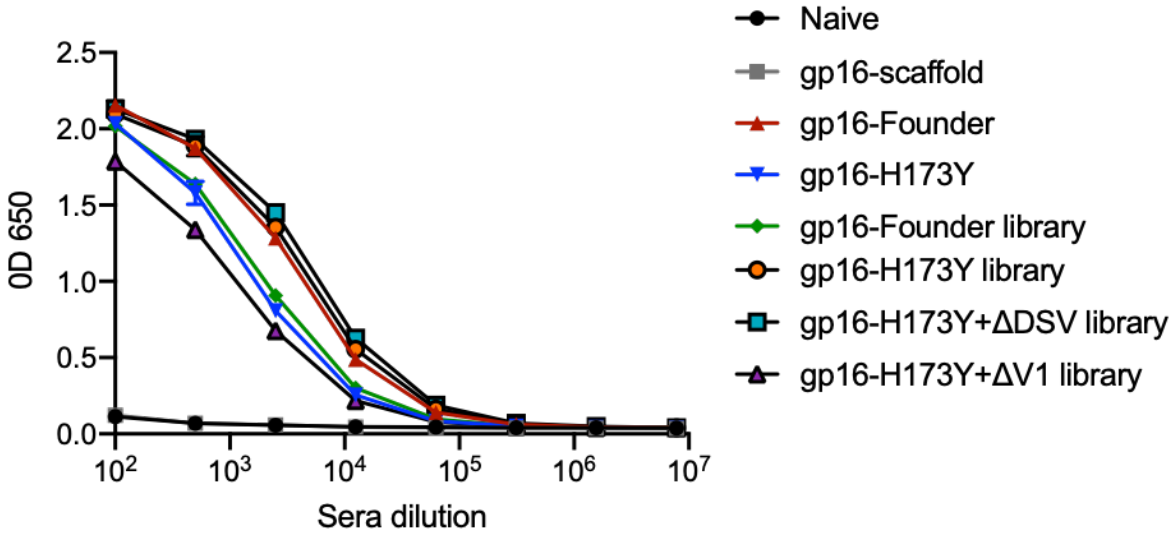

1187

1188

1189 **Fig S6. V1V2-specific binding responses in the terminal bleed sera.** V1V2-antibodies were detected in mice groups  
1190 immunized with buffer (no antigen, Naïve group), gp16-scaffold only (no V1V2 control), gp16-V1V2- T/F07, H173Y,  
1191 T/F07 library, H173Y library, H173Y+ΔDSV library and H173Y+ΔV1 library. A color-coded key is provided on the  
1192 right side of the graph for each binding curve. Both naïve and gp16-scaffold only groups showed no non-specific  
1193 reactivity towards the coating antigen. The antibody titers are determined through ELISA. Respective purified  
1194 recombinant soluble gp140-T/F07, -H173Y, -ΔDSV, -H173Y+ΔDSV and -H173Y+ΔV1 Env glycoproteins were  
1195 used as coating antigens (1µg/ml) matching the V1V2 region (parental template mutations for combinatorial libraries).  
1196 Triplicate absorbance (OD 650 nm) readings are used to generate binding curves.



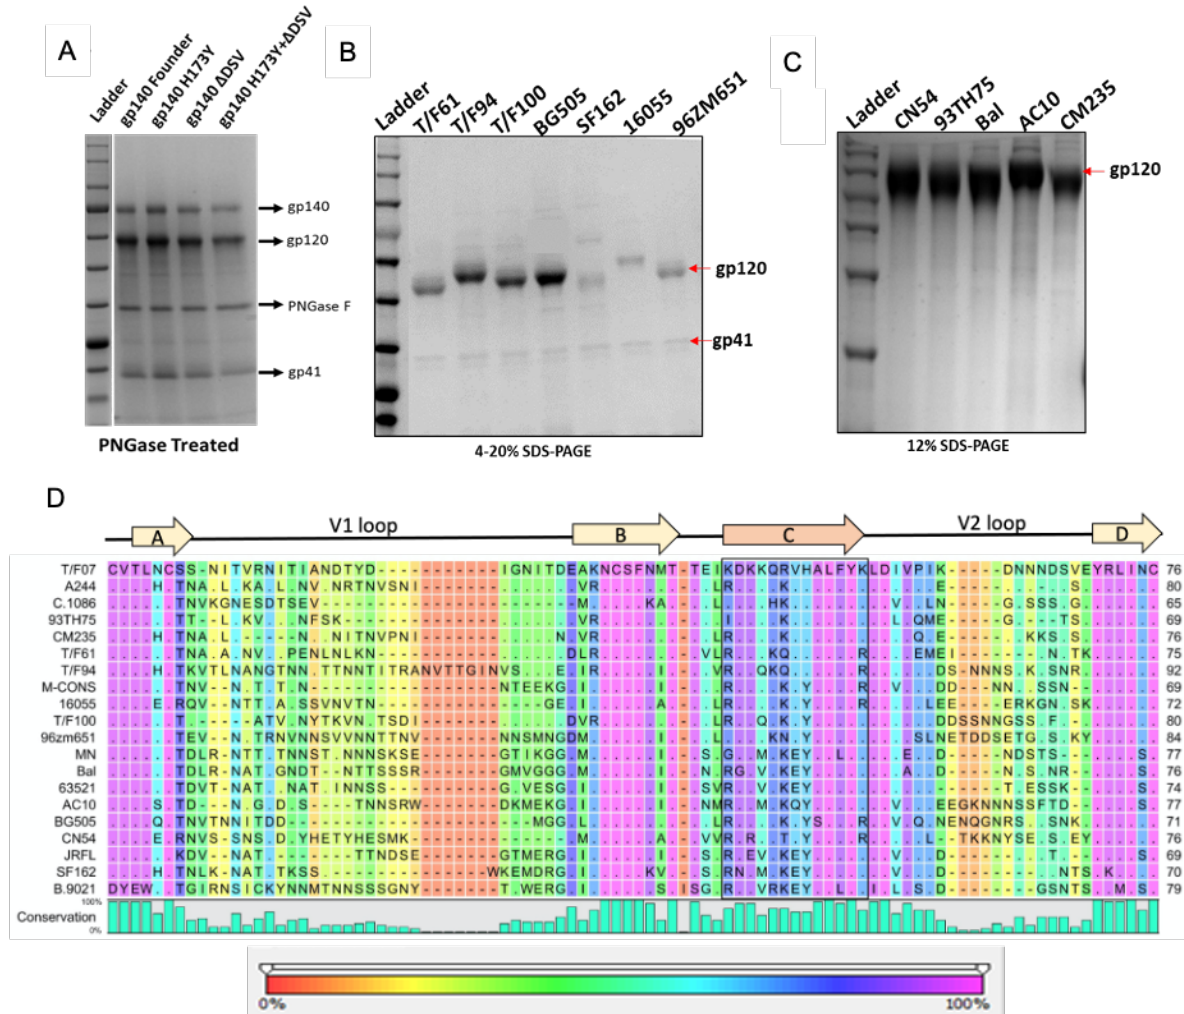

1197

1198

1199 **Fig S7. Antigens purified to determine cross-reactive responses and breadth.** (A-C) Reducing SDS-PAGE gel  
 1200 profile of GnTi expressed recombinant His-tagged Env proteins, gp140-T/F07 and its V2 mutants (A); gp140s  
 1201 (cleaved into gp120 and gp41 subunits) (B) and gp120s (C) of different HIV-1 subtypes used as heterologous Env  
 1202 antigens. (D) V1V2 sequences of the diverse HIV-1 subtypes included in the heterologous Env protein library used to  
 1203 determine breadth. Degree of conservation (0-100%) at each residue position is depicted graphically at the bottom of  
 1204 the alignment. Variability in the V1V2 region of the chosen Env antigens is shown with background color gradient  
 1205 (red to pink) showing conservation on a scale of 0-100%.

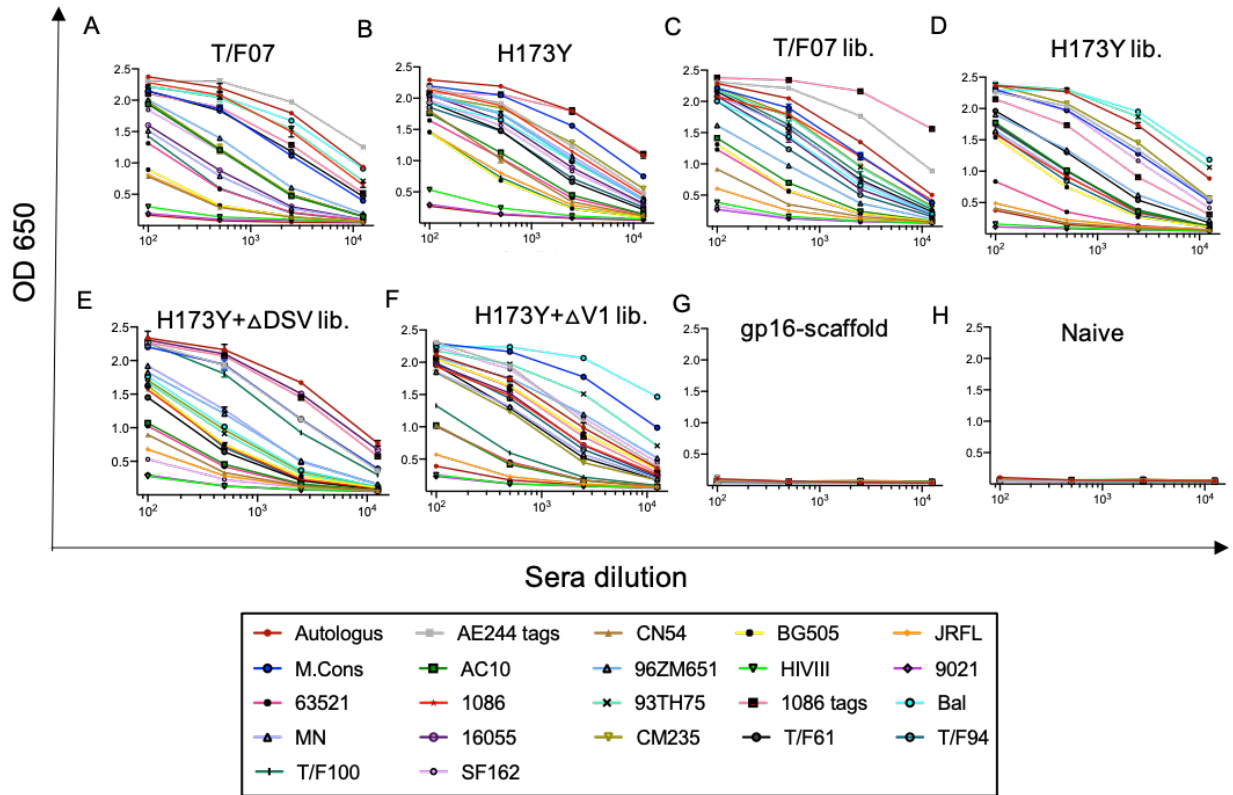

1206

1207

1208 **Fig S8. Breadth analysis of V2 combinatorial library immunogens using heterologous Env antigen library.** (A-  
 1209 H) ELISA generated binding curves showing the reactivity of sera of mice groups immunized with T/F07 (A) H173Y  
 1210 (B), and combinatorial V2 libraries (lib.); (C) T/F07 (D) H173Y (E) H173Y+ $\Delta$ DSV (F) H173Y+ $\Delta$ V1 groups (G).  
 1211 gp16-scaffold (H) and Naïve (I) groups sera were used as negative controls. Experiment was performed with 5-fold  
 1212 serially diluted pooled sera from each group in triplicates. Curves are color-coded for respective antigen provided in  
 1213 the legend at the bottom of the panel.
